# Supplementary material
Source: PubMed Central journal article supplement (PMC6235047)
Supplement: rspb20181792supp1.pdf [file rspb20181792supp1.pdf]

1 Supplementary Material

2 **Dental ontogeny in extinct synapsids reveals a complex evolutionary**  
3 **history of the mammalian tooth attachment system**

4 Aaron R. H. LeBlanc<sup>1,2</sup>, Kirstin S. Brink<sup>1,3</sup>, Megan Whitney<sup>4</sup>, Fernando Abdala<sup>5,6,7</sup>, and  
5 Robert R. Reisz<sup>1,8,9</sup>

6 <sup>1</sup>Department of Biology, University of Toronto Mississauga, 3359 Mississauga Road, Mississauga, Ontario,  
7 L5L 1C6, Canada

8 <sup>2</sup>Department of Biological Sciences, Faculty of Science, University of Alberta, Edmonton, AB, T6G 2E9,  
9 Canada, arl@ualberta.ca

10 <sup>3</sup>Department of Oral Health Sciences, Faculty of Dentistry, Life Sciences Institute, University of British  
11 Columbia, Vancouver, BC, Canada

12 <sup>4</sup>Department of Biology and Burke Museum, University of Washington, Seattle, WA, U.S.A

13 <sup>5</sup>Unidad Ejecutora Lillo, Conicet, Tucumán, Argentina

14 <sup>6</sup>Evolutionary Studies Institute and School of Geosciences, University of the Witwatersrand, Johannesburg,  
15 South Africa

16 <sup>7</sup>National Research Foundation, Centre of Excellence: Palaeosciences, Pretoria, South Africa

17 <sup>8</sup>Institute of Oral Medicine, College of Medicine, National Cheng Kung University, Tainan, Taiwan,  
18 Republic of China

19 <sup>9</sup>Jilin University, DERC, Changchun, Jilin Province, China

20

21 Corresponding author: Aaron LeBlanc (arl@ualberta.ca)

22

# 1 Supplementary Information S1: Histological data

2

| <b>Taxon I</b>    | <b>Taxon II</b>  | <b>Genus/Species</b>        | <b>Specimen</b>                                 | <b>Section description</b>                                            | <b>Cat. No.</b> | <b>ROM thin section no.</b>                                         |
|-------------------|------------------|-----------------------------|-------------------------------------------------|-----------------------------------------------------------------------|-----------------|---------------------------------------------------------------------|
| “Pelycosauria”    | Caseidae         | <i>Oromycter</i>            | Partial maxilla                                 | Transv. sec. of 2 teeth x3;<br>long. sec. of 2 teeth x1               | ROM 67604       | 00532, 00533,<br>00550, 00877                                       |
| “Pelycosauria”    | Varanopidae      | Indet                       | Partial dentary                                 | Transv. sections x3                                                   | ROM 66866       | 00441, 00477,<br>00193                                              |
| “Pelycosauria”    | Varanopidae      | Indet                       | Maxilla fragment                                | Long. section x2                                                      | ROM 67513       | 00144, 00145                                                        |
| “Pelycosauria”    | Varanopidae      | Indet                       | Dentary                                         | Transv. sec. of 5 teeth x3                                            | ROM 67514       | 00132, 00158                                                        |
| “Pelycosauria”    | Edaphosauridae   | <i>Edaphosaurus</i>         | Dentary                                         | Transv. sec. of 2 teeth x7;<br>coronal sec. thru 1 tooth<br>x1        | NHB<br>2041070  | 00524, 00531,<br>00534, 00535,<br>00555, 00805,<br>00875, 00876     |
| “Pelycosauria”    | Sphenacodontidae | <i>Secodontosaurus</i>      | Jaw fragment                                    | Transv. sec. of 2 teeth x2                                            | ROM 6027        | 00410, 00411                                                        |
| “Pelycosauria”    | Sphenacodontidae | <i>Sphenacodon ferocior</i> | Jaw fragment                                    | Transv. sections x9                                                   | ROM 66105       | 00097, 00098, 00099,<br>00100, 00104, 00105,<br>00106, 00117, 00127 |
| “Pelycosauria”    | Sphenacodontidae | <i>Sphenacodon ferocior</i> | Partial maxilla                                 | Transv. sec. of 4 teeth x5;<br>coronal sec. thru 1 tooth<br>x2        | CM 89931        | 00885, 00886,<br>00890, 00891,<br>00893, 00894,<br>00902            |
| “Pelycosauria”    | Sphenacodontidae | <i>Dimetrodon limbatus</i>  | Partial dentary                                 | Transv. sec. of 4 teeth x4                                            | StIPB R-<br>602 | 00119, 00118,<br>00131, 00594                                       |
| “Pelycosauria”    | Sphenacodontidae | <i>Dimetrodon limbatus</i>  | Partial maxilla                                 | Transv. sec. of 4 teeth x5                                            | StIPB R-<br>601 | 00113, 00124,<br>00129, 2xN/A                                       |
| “Pelycosauria”    | Sphenacodontidae | <i>Dimetrodon grandis</i>   | Partial right maxilla                           | Transv. sec. of 2 teeth x7                                            | ROM 6039        | 00140, 00141,<br>00153, 00160,<br>00166, 00178,<br>00195            |
| <b>Therapsida</b> | Dinocephalia     | Indet.                      | Partial dentary                                 | Transv. sec. of 7 teeth x1                                            | BP/1/6854       | 00950                                                               |
| <b>Therapsida</b> | Dinocephalia     | Indet.                      | Ant. fragment of<br>dentary                     | Transv. sec. of 3 teeth x3                                            | BP/1/4851       | 00904, 00916,<br>00931                                              |
| <b>Therapsida</b> | Dinocephalia     | Indet.                      | Ant. fragment of left<br>dentary                | Transv. sec. of 5 teeth x1;<br>coronal sec. thru anterior<br>tooth x1 | BP/1/5417       | 00955, 00956                                                        |
| <b>Therapsida</b> | Tapinocephalidae | Indet.                      | Anterior dentary<br>fragment (with no<br>teeth) | Transverse section of<br>empty tooth socket                           | NHCC<br>LB370   | N/A                                                                 |
| <b>Therapsida</b> | Tapinocephalidae | Indet.                      | Isolated incisor                                | Coronal section of whole<br>tooth                                     | NHCC<br>LB733   | N/A                                                                 |
| <b>Therapsida</b> | Anomodontia      | <i>Diictodon</i> “A”        | Partial skull                                   | Coronal sec. of both teeth<br>x3                                      | ROM 52624       | 00708, 00709, N/A                                                   |

|                   |              |                      |                         |                                                                 |             |                                                         |
|-------------------|--------------|----------------------|-------------------------|-----------------------------------------------------------------|-------------|---------------------------------------------------------|
| <b>Therapsida</b> | Anomodontia  | <i>Diictodon</i> "B" | Partial skull           | Coronal sec. of both teeth x1; transv. thru tooth x1            | ROM 52624   | 00028, N/A                                              |
| <b>Therapsida</b> | Anomodontia  | <i>Diictodon</i> "C" | Partial maxilla         | Coronal sec. of tooth x5                                        | ROM 52624   | 00508, N/A 00706 00707, N/A                             |
| <b>Therapsida</b> | Anomodontia  | <i>Lystrosaurus</i>  | Partial maxilla         | Transv. sec. thru tusk                                          | UWBM 109908 | N/A                                                     |
| <b>Therapsida</b> | Gorgonopsia  | Indet.               | Partial dentary         | Transv. sections of left dentary x2                             | BP/1/784    | 01002, 01003                                            |
| <b>Therapsida</b> | Gorgonopsia  | Indet.               | Partial skull           | Transv. sections of right maxilla x2                            | BP/1/2395a  | 00967, 00975, 00983                                     |
| <b>Therapsida</b> | Gorgonopsia  | Indet.               | Anterior jaw fragment   | Transv. sections                                                | NMT RB404   | N/A                                                     |
| <b>Therapsida</b> | Gorgonopsia  | Indet.               | Jaw fragment            | Transv. sections                                                | NHCC LB367  | N/A                                                     |
| <b>Therapsida</b> | Terocephalia | Indet.               | Partial dentary         | Transv. sec. of 8 teeth x4                                      | BP/1/7257   | 00887, 00892, 00895, 00903                              |
| <b>Therapsida</b> | Terocephalia | Indet.               | Partial skull           | Transv. sec. of 6 teeth x3; coronal sec. thru 1 tooth x3        | BP/1/172    | 00988, 00989, 00990, 00997, 0998, 09999                 |
| <b>Therapsida</b> | Terocephalia | <i>Bauria</i>        | Nearly complete dentary | Coronal sec. of tooth x4; transv. sec. thru teeth x4            | BP/1/2523   | 00830, 00835, 00837 00838, 00843, 00870, 00871, 00872   |
| <b>Therapsida</b> | Cynodontia   | ? <i>Cynognathus</i> | Partial dentary         | Transv. sec. of 2 teeth x5                                      | BP/1/6097   | 00831, 00832, 00839, 00844, 00874                       |
| <b>Therapsida</b> | Cynodontia   | <i>Diademodon</i>    | Nearly complete maxilla | Coronal sec. of individual teeth x4; transv. sec. thru teeth x4 | BP/1/4652   | 00833, 00834, 00836, 00840, 00841, 00842, 00867, 00873, |
| <b>Therapsida</b> | Cynodontia   | <i>Galesaurus</i>    | Skull + mandibles       | CT scans of a subadult individual                               | BP/1/4602   | N/A                                                     |
| <b>Therapsida</b> | Cynodontia   | <i>Galesaurus</i>    | Skull + mandibles       | CT scans of an older individual                                 | BP/1/5064   | N/A                                                     |
| <b>Therapsida</b> | Cynodontia   | <i>Thrinaxodon</i>   | Skull + mandibles       | CT scans of a young individual                                  | BP/1/5372   | N/A                                                     |
| <b>Therapsida</b> | Cynodontia   | <i>Thrinaxodon</i>   | Skull + mandibles       | CT scans of an older individual                                 | BP/1/7199   | N/A                                                     |
| <b>Therapsida</b> | Mammalia     | <i>Hyopsodus</i>     | Partial dentary         | 2 long. Sec. of 2 teeth; 2 coronal sec. thru 1 tooth            | USNM 595273 | 00579, 00580, 00603, 00604                              |
| <b>Therapsida</b> | Mammalia     | <i>Equus</i>         | Partial dentary         | Transv. sec. of 2 teeth x1; coronal sec. x1                     | ROM 33036   | 00197, 00203                                            |

1 **Table S1.** Synapsid specimens sectioned and CT scanned in this study. Abbreviations:  
2 Cat. No., Catalogue Number; ROM thin section no., Royal Ontario thin section number  
3 (only applicable to samples sectioned at the Royal Ontario Museum); BP, Evolutionary  
4 Studies Institute (South Africa); CM, Carnegie Museum (Pittsburgh, U.S.A.); NHCC  
5 (National Heritage Conservations Commission (Lusaka, Zambia); NMT National  
6 Museum of Tanzania (Dar es Salaam, Tanzania); UWBM, Burke Museum of Natural  
7 History (Seattle, U.S.A); ROM, Royal Ontario Museum (Toronto, Canada); StIPB,  
8 Steinmann Institute for Geology, Mineralogy, and Paleontology (Bonn, Germany);  
9 USNM, National Museum of Natural History (Washington, U.S.A.)

10

11

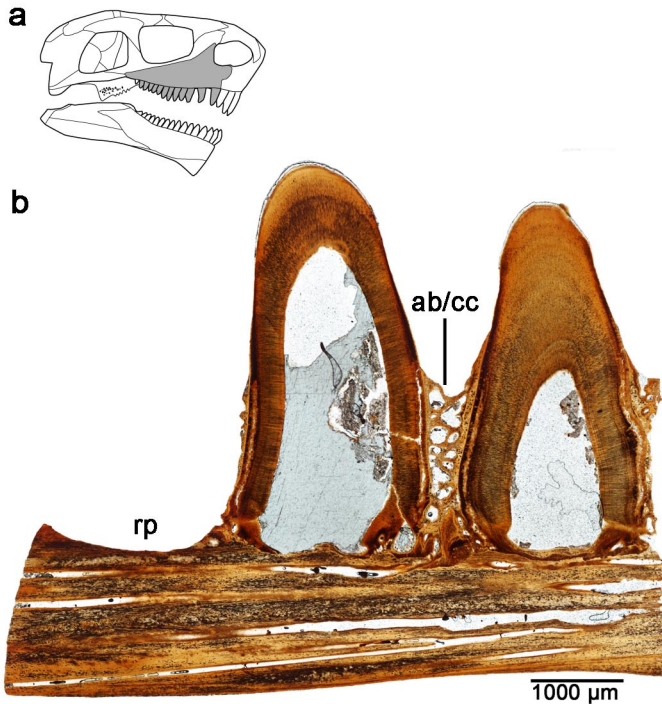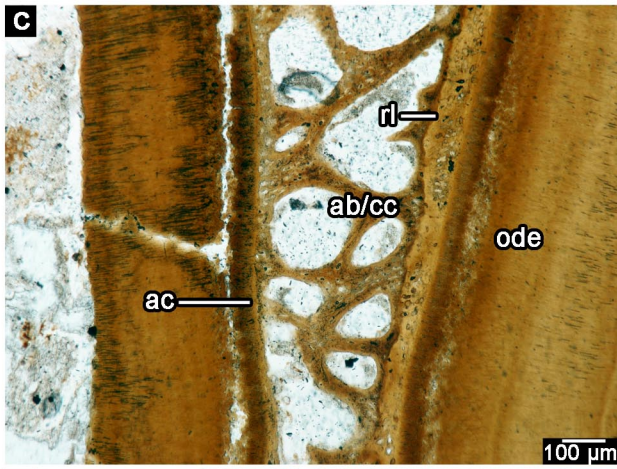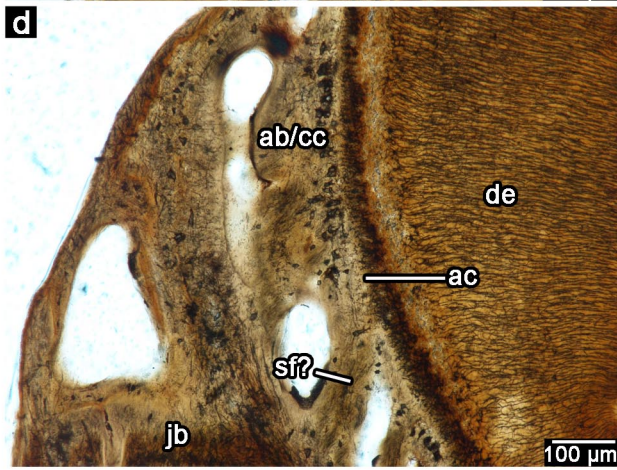

1

1 **Supplementary Figure 1.** Tooth attachment tissues in the Early Permian caseid  
2 *Oromycter*. **a**, skull drawing of a caseid highlighting the elements sampled in this study  
3 (modified from[1]. **b**, longitudinal section of a partial maxilla (ROM 67604) showing  
4 teeth that were shed and those that are ankylosed to the jaw. **c**, closeup of tooth  
5 attachment tissues between two teeth, note that the alveolar bone of the younger tooth  
6 (left) directly attaches to the alveolar bone of the older tooth (right). **d**, closeup image of  
7 the tooth attachment tissues in coronal aspect. Abbreviations: ab, alveolar bone; ac,  
8 acellular cementum; cc, cellular cementum; de, dentine; jb, jawbone; ode, dentine of  
9 older tooth; rl, reversal line; rp, replacement pit; sf, Sharpey's fibers.

10

## 11 “Pelycosauria”: Caseidae

12 Thin sections of a partial maxilla of the early Permian caseid *Oromycter* were  
13 made in transverse, longitudinal, and coronal aspects (Suppl. Fig. 1, Suppl. Table 1). The  
14 teeth of *Oromycter* are found either fully ankylosed to the jaws or in the process of  
15 erupting, the latter teeth only being preserved as resorption pits along the tooth row.  
16 Tooth ankylosis is also clearly seen along broken teeth in the holotype of *Cotylorhynchus*  
17 (OMNH 04327) and *Ennatosaurus tecton* (PIN 1580). The thin sections of *Oromycter*  
18 confirm that each tooth is ankylosed to the jaw (Suppl. Fig. 1) and show that the dentine  
19 of each tooth is coated in a thin, cloudy band of acellular tissue that bears resemblance to  
20 the fibrillar, acellular cementum in captorhinids [2]. As in captorhinids, it is unclear if the  
21 thin fibrils within this tissue are of intrinsic or extrinsic origin, but this acellular  
22 cementum layer is distinct from the underlying dentine and the overlying bone tissue. A  
23 microcancellous bone tissue extends from the tooth root surface to the jaw, or to  
24 neighbouring teeth and firmly anchors each tooth in place (Suppl. Fig. 1b–d). This bone  
25 tissue is composed of thin bone trabeculae and large, simple vascular spaces and sparse  
26 primary osteons, but no secondary osteons. Large, globular cell lacunae line the areas  
27 closest to the acellular cementum, whereas most of the cell lacunae along the outer  
28 fringes of this bone tissue and the bone of the jaw are smaller and more elongate. The  
29 trabeculae forming the bone anchoring the teeth to the jaws contain numerous coarse,

1 dark fibers that mainly extend towards the tooth roots. These fibers probably represent  
2 the mineralized collagen fibers of the periodontal ligament, entombed in cementum and  
3 alveolar bone.

4

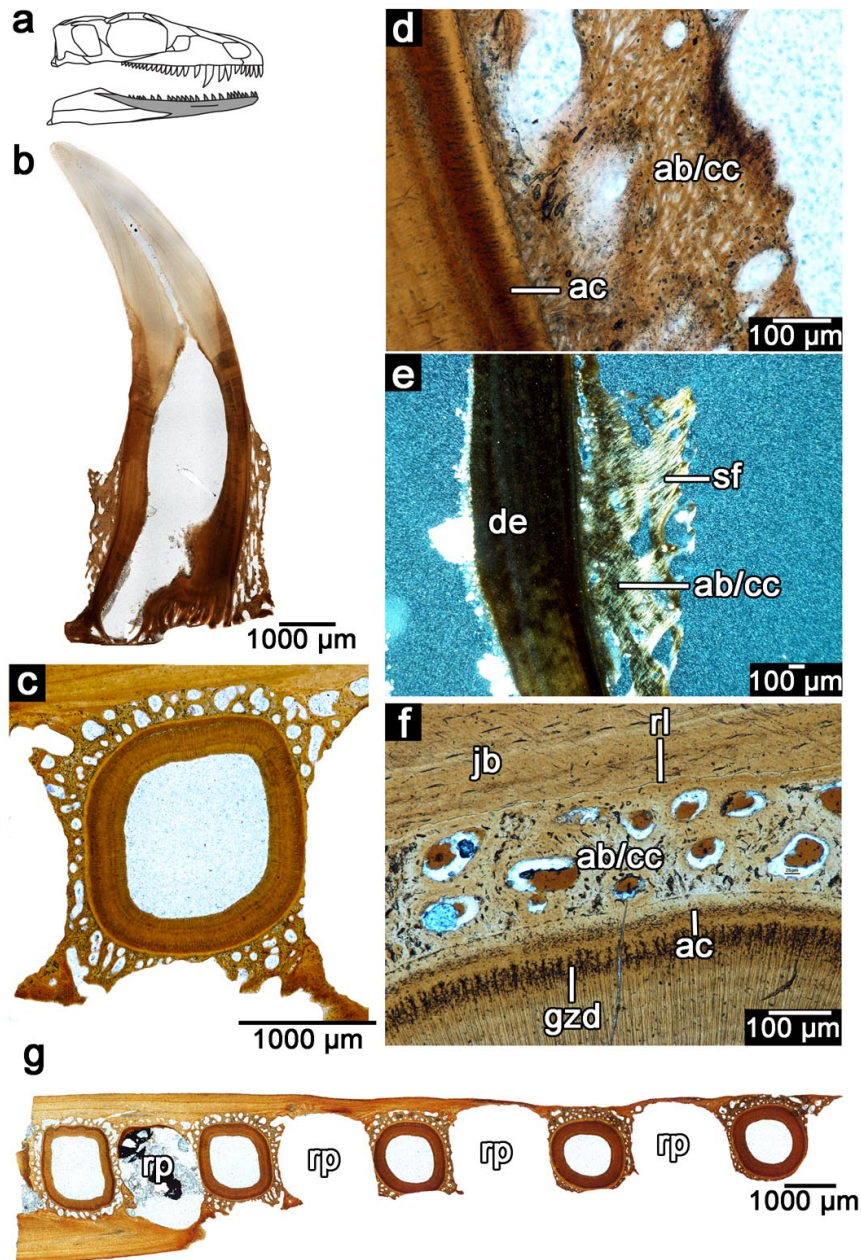

5

6 **Supplementary Figure 2.** Tooth attachment tissues in an Early Permian varanopid. **a,**  
7 skull drawing of a varanopid highlighting the elements sampled in this study (modified

1 from[3]. **b**, wholeview of a tooth sectioned in coronal aspect (ROM 67513). **c**, wholeview  
2 of a dentary tooth sectioned in transverse aspect (ROM 66866). **d**, closeup of bone-like  
3 attachment tissue that ankyloses varanopid teeth to the jawbone in coronal section. **e**,  
4 closeup of bone-like attachment tissue under cross-polarized light, note the prevalence of  
5 Sharpey's fibers. **f**, closeup image of attachment tissues in transverse section. **g**,  
6 wholeview of a varanopid dentary sectioned in transverse aspect (ROM 66866). Note that  
7 teeth are either absent due to replacement, or are fully ankylosed to the jaws.  
8 Abbreviations: ab, alveolar bone; ac, acellular cementum; cc, cellular cementum; de,  
9 dentine; gzd, globular zone of dentine; jb, jawbone; rl, reversal line; rp, replacement pit;  
10 sf, Sharpey's fibers.

11

## 12 “Pelycosauria”: Varanopidae

13 Two partial dentaries and a partial maxilla of a mycterosaurine varanopid from  
14 the Early Permian Richards Spur locality were sectioned for this analysis. All of the teeth  
15 were either in the process of erupting or were fully ankylosed to the jaws by  
16 microcancellous bone tissue (Suppl. Fig. 2). The outer layers of dentine in each tooth  
17 consist of thick layers of highly branched dentine tubules, corresponding to the globular  
18 zone of dentine reported in other amniotes. A thin band of light-coloured tissue coats the  
19 dentine of each tooth root and is histologically consistent with acellular cementum  
20 (Suppl. Fig. 2d, f).

21 The acellular cementum is in turn directly connected to a microcancellous bone  
22 tissue consisting of primary, woven bone trabeculae. Most of the simple vascular spaces  
23 and primary osteons in this tissue are oriented parallel to the apical-occlusal axis of each  
24 tooth, whereas the vascular spaces in the surrounding jawbone are typically oriented  
25 perpendicular to this axis (Suppl. Fig. 2c, f, g). The osteocyte lacunae within the  
26 microcancellous bone tissue are much larger and more disorganized than those within the  
27 jawbone. A clear reversal line separates the microcancellous bone surrounding each tooth  
28 from the jawbone, indicating that this bone tissue is resorbed and redeposited with each



1 tooth, suggesting that it is one of the periodontal tissues that form anew with each new  
2 tooth (Suppl. Fig. 2d, f). These features are consistent with either cellular cementum or  
3 alveolar bone, depending on the growth direction of this tissue. Unfortunately, lack of  
4 preservation of intermediate stages of periodontal tissue formation makes it impossible to  
5 tell if this tissue grew centripetally (alveolar bone) or centrifugally (cellular cementum).  
6 In coronal section, this spongy bone tissue extends from the alveolar margin down to the  
7 base of the tooth root (Suppl. Fig. 2b). At higher magnifications, this tissue has a fibrous  
8 texture that is oriented perpendicular to the long axis of the tooth and consists of  
9 abundant, roughly parallel Sharpey's fibers under cross polarized light (Suppl. Fig. 2e),  
10 indicating the presence of a completely calcified periodontal ligament.

11

12

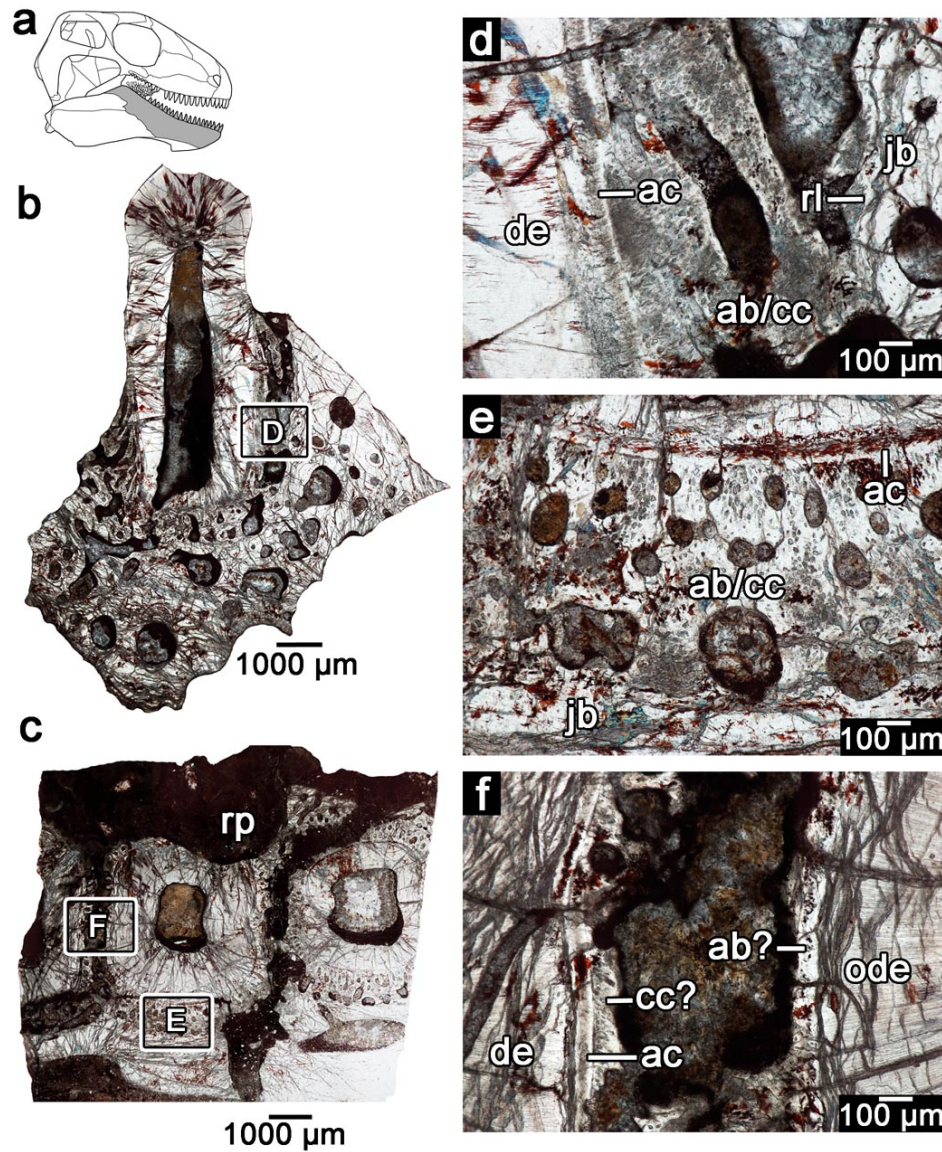

1  
2 **Supplementary Figure 3.** Tooth attachment tissues in *Edaphosaurus* (NHB 2041070).  
3 **a**, skull drawing of *Edaphosaurus* highlighting the elements sampled in this study  
4 (modified from [1]. **b**, wholeview of a dentary tooth sectioned in coronal aspect. **c**,  
5 wholeview of three teeth sectioned in transverse aspect. **d**, closeup of dental attachment  
6 tissues that ankylose the teeth to the jaws in coronal view. **e**, closeup of dental attachment  
7 tissues in transverse view. **f**, closeup of dental attachment tissues between two teeth in  
8 transverse view, potentially showing intermediate stage of development. Abbreviations:  
9 ab, alveolar bone; ac, acellular cementum; cc, cellular cementum; de, dentine; ode,  
10 dentine of older tooth; jb, jawbone; rl, reversal line; rp, replacement pit.

## 1 “Pelycosauria”: Edaphosauridae

2           Thin sections through a partial dentary of *Edaphosaurus* (Suppl. Fig. 3) show  
3 similar fusion of the teeth to the surrounding jawbone as in caseids and varanopids. Each  
4 tooth is anchored in place by spongy, primary bone tissue. As in caseids and varanopids,  
5 the dentine of each tooth root is coated in a well-defined band of acellular cementum  
6 (Suppl. Fig. 3d–f), which in turn directly contacts the surrounding, spongy bone. The  
7 acellular cementum contains numerous parallel fibrils, similar to the acellular cementum  
8 of captorhinids [2], varanopids, and caseids. The numerous vascular spaces within the  
9 surrounding bone tissue are all oriented parallel to the apico-occlusal axis of the tooth and  
10 have larger diameters towards the outer fringes of the bone tissue. The cell lacunae within  
11 this tissue are large and round, differing markedly from the small, flat lacunae within the  
12 jawbone. Unfortunately, the poor preservational quality of the material precludes any  
13 detailed view of the histology of the bone tissues. However, the presence of large cell  
14 lacunae, high vascularity, and a persistent reversal line between the outer layers of this  
15 bone and the surrounding hard tissues (Suppl. Fig. 3d, e) indicate that this tissue formed  
16 rapidly and in association with each new tooth. From these data, it is clear that each tooth  
17 was firmly ankylosed to the jaw and to neighbouring teeth prior to being replaced (Suppl.  
18 Fig. 3). The rapid formation of this tissue and the lack of preservation of intermediate  
19 stages of tooth tissue formation make it difficult to assign the surrounding bone tissue to  
20 cellular cementum or to alveolar bone, although there is some evidence for two growth  
21 directions for this tissue (Suppl. Fig. 3e, f).

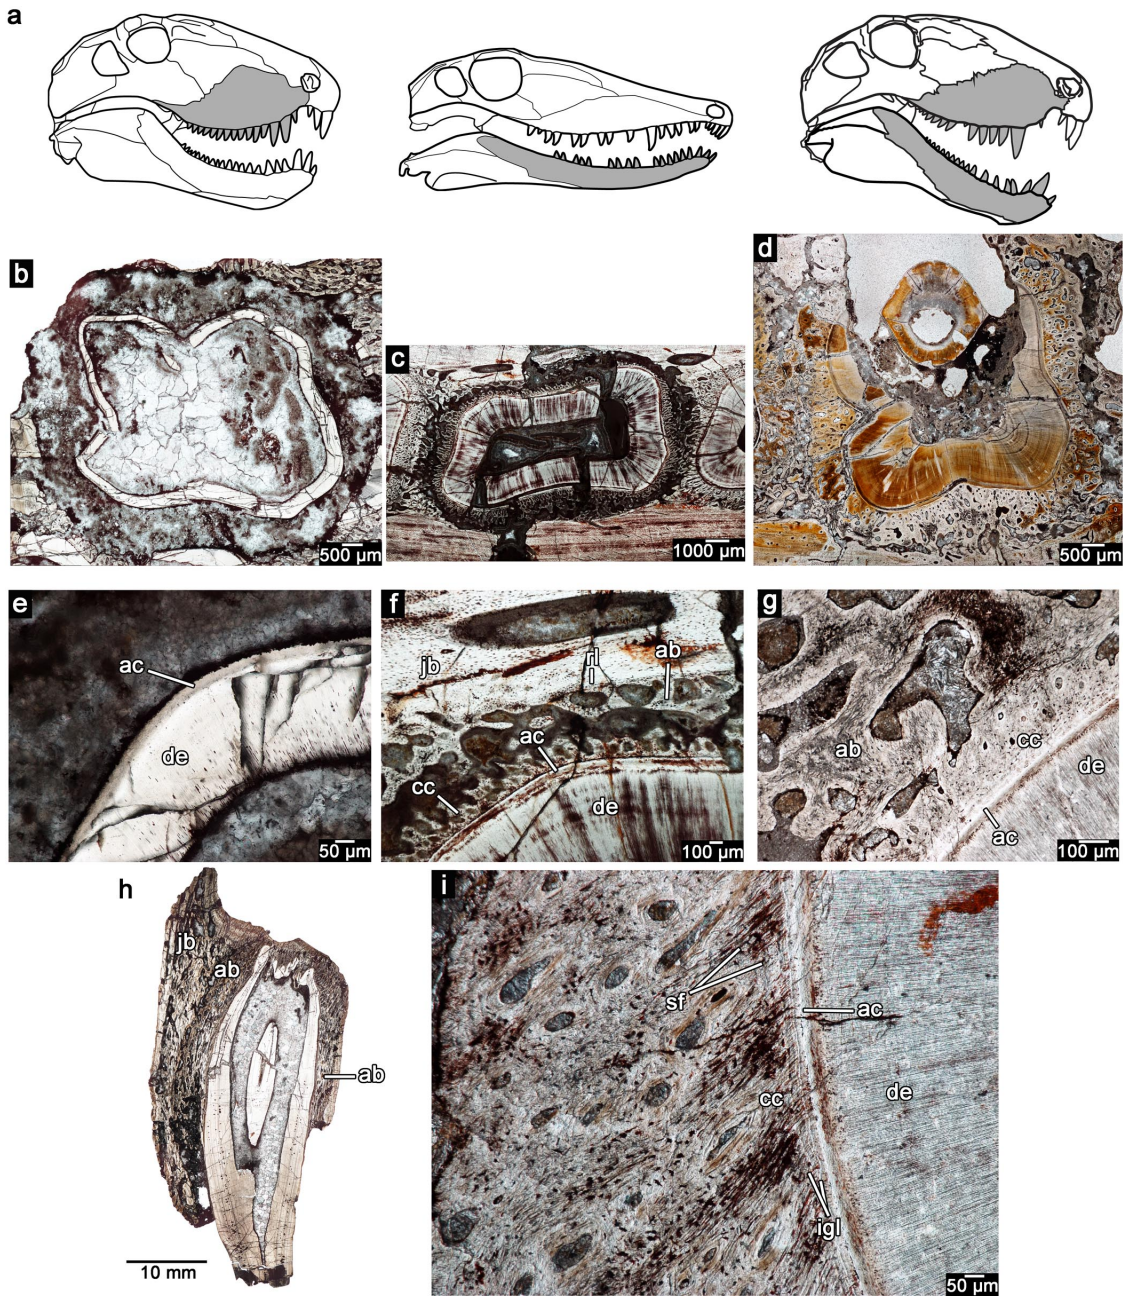

1

2 **Supplementary Figure 4.** Tooth attachment tissues in Sphenacodontidae. **a**, skull  
 3 drawings of *Sphenacodon*, *Secodontosaurus*, and *Dimetrodon* highlighting elements  
 4 sampled in this study (modified from[4]. **b**, closeup of a single maxillary tooth root of  
 5 *Sphenacodon* that is in the process of erupting (CM 89931). Note the replacement pit that  
 6 encircles the developing tooth. **c**, closeup of a single dentary tooth root of  
 7 *Secodontosaurus* that is in an intermediate stage of attachment tissue development  
 8 (*ROM6027*). **d**, closeup of a single dentary tooth root of *Dimetrodon* at an advanced

1 stage of development (StIPB R-602). The tooth is completely ankylosed to the jaws and  
2 is in the process of being replaced. **e**, closeup of the unerupted tooth in **b** showing early  
3 development of acellular cementum, but no other attachment tissues. **f**, closeup of the  
4 erupted tooth in **c** showing the development of the attachment tissues. Alveolar bone  
5 develops along the fringes of the replacement pit and grows centripetally, whereas the  
6 spongy cellular cementum develops from the root surface and grows centrifugally. **g**,  
7 closeup of a maxillary tooth of *Dimetrodon* showing complete ankylosis (ROM 6039),  
8 when the alveolar bone and cellular cementum meet and close off the periodontal space.  
9 **h**, wholeview of the maxillary caniniform tooth of *Sphenacodon* exhibiting complete  
10 ankylosis (CM 89931). **i**, closeup image of dental attachment tissues of the same  
11 *Dimetrodon* tooth as in (G). Abbreviations: ab, alveolar bone; ac, acellular cementum; cc,  
12 cellular cementum; de, dentine; igl, incremental growth lines; jb, jawbone; rl, reversal  
13 line; sf, Sharpey's fibers.

14

## 15 “Pelycosauria”: Sphenacodontidae

16 Several specimens of three sphenacodontid genera were sectioned (Suppl. Table  
17 1) and nearly all of the teeth exhibited complete ankylosis to the surrounding jawbone  
18 and to neighbouring teeth (Suppl. Fig. 4). Transverse sections of some of the larger  
19 individuals show that the teeth of sphenacodontids were ankylosed to the jaw, but the  
20 surrounding bony tissue exhibited a high degree of differentiation (Suppl. Fig. 4d, g, i).  
21 The dentine of the tooth roots is coated in thin bands of avascular, acellular tissue (Suppl.  
22 Fig. 4i). This layer corresponds to the acellular cementum of mammals and other  
23 amniotes [2,5]. In the larger specimens of *Dimetrodon* and *Sphenacodon*, incremental  
24 bands of cellular, bone-like tissue line the acellular cementum and represent the cellular  
25 cementum of the tooth root (Suppl. Fig. 4i). This tissue is also perforated by numerous,  
26 well-organized Sharpey's fibers that extend through the cellular cementum layers and  
27 nearly reach the acellular cementum band. The bony tissue that forms the bulk of the  
28 attachment of the tooth to the jaw is highly vascularized and occurs in two distinct zones.  
29 The inner zone, closest to the tooth, is composed of smaller vascular spaces and contains

1 the well-organized network of Sharpey's fibers that extend towards the tooth root. The  
2 outer portion of the periodontium is a bony tissue with much larger vascular spaces and  
3 an irregular arrangement of Sharpey's fibers, with very little directionality to the fibers  
4 within the bone matrix when compared to the more internal layers. This tissue consists of  
5 rapidly deposited woven bone and is separated from the bone of the jaw by a reversal  
6 line, indicating that this tissue was deposited after resorption of the previous tooth tissues  
7 (Suppl. Fig. 4f).

8           None of the individual jaw fragments exhibited enough stages of hard tissue  
9 formation to reconstruct the ontogenetic stages of tooth attachment or the growth  
10 directions of the individual tissues for a given sphenacodontid taxon. The most common  
11 condition was for teeth to be either preserved as partially erupted crowns with incipient  
12 roots (Suppl. Fig. 4b), or as completely ankylosed teeth (Suppl. Fig. 4g–i). However, in  
13 rare instances, teeth were preserved nearly erupted and sometimes exhibiting early stages  
14 of periodontal tissue formation (Suppl. Fig. 4f). Combining sections from different  
15 specimens permits a reconstruction of the ontogenetic sequence of tooth attachment in  
16 sphenacodontids, which appears to be consistent across taxa, based on gross histology.

17           Teeth that were nearly erupted consisted of dentine, an enamel cap, and a thin  
18 band of acellular cementum coating the root. A transverse section through a partial  
19 maxilla of *Sphenacodon* shows a post-caniniform maxillary tooth at this stage. Sections  
20 through the four-lobed root show that no cellular cementum or alveolar bone was present  
21 at this early stage of eruption and the surrounding hard tissues had been partially resorbed  
22 to accommodate the new tooth (Suppl. Fig. 4b). The subsequent stage involved the  
23 development of alveolar bone and cellular cementum, once the tooth had fully erupted. In  
24 sphenacodontids, there are two growth directions to the vascularized bone tissues that  
25 surround each tooth: the tissue coating the tooth root, which contains small vascular  
26 spaces appears to have grown centrifugally, whereas the more vascularized bone tissue  
27 surrounding the entire tooth root grew centripetally. These two tissues appear to have  
28 joined together very rapidly once the tooth had erupted, given the rarity of teeth in our  
29 sample from stages between eruption and complete ankylosis. However, based on a  
30 transverse section of a partial jaw of *Secodontosaurus* there was a brief point at which

1 cellular cementum and alveolar bone were separate tissues that grew towards each other  
2 (Suppl. Fig. 4f). The growth direction and histological features of the outer bone layer are  
3 consistent with alveolar bone [6,7]. The more internal vascularized layer is consistent  
4 with cellular cementum. Cellular cementum appears to have been quite extensive and  
5 probably met the surrounding alveolar bone far from the surface of the tooth root (Suppl.  
6 Fig. 4f, g). The alveolar bone and cellular cementum were both perforated by Sharpey's  
7 fibers (Suppl. Fig. 4i) indicating that an unmineralized periodontal ligament was present  
8 during the brief intermediate stage between tooth eruption and complete ankylosis. By the  
9 time a new tooth had begun to form lingual to its predecessor, the functional tooth was  
10 completely ankylosed to the jaws (Suppl. Fig. 4d). The alveolar bone and cementum of  
11 functional teeth at this stage were still composed of primary tissue (i.e., no remodeling  
12 was observed), however layers of lamellar bone, a characteristic of primary osteon and  
13 cementson development [8–10], fringe the vascular spaces in the alveolar bone and  
14 cementum.

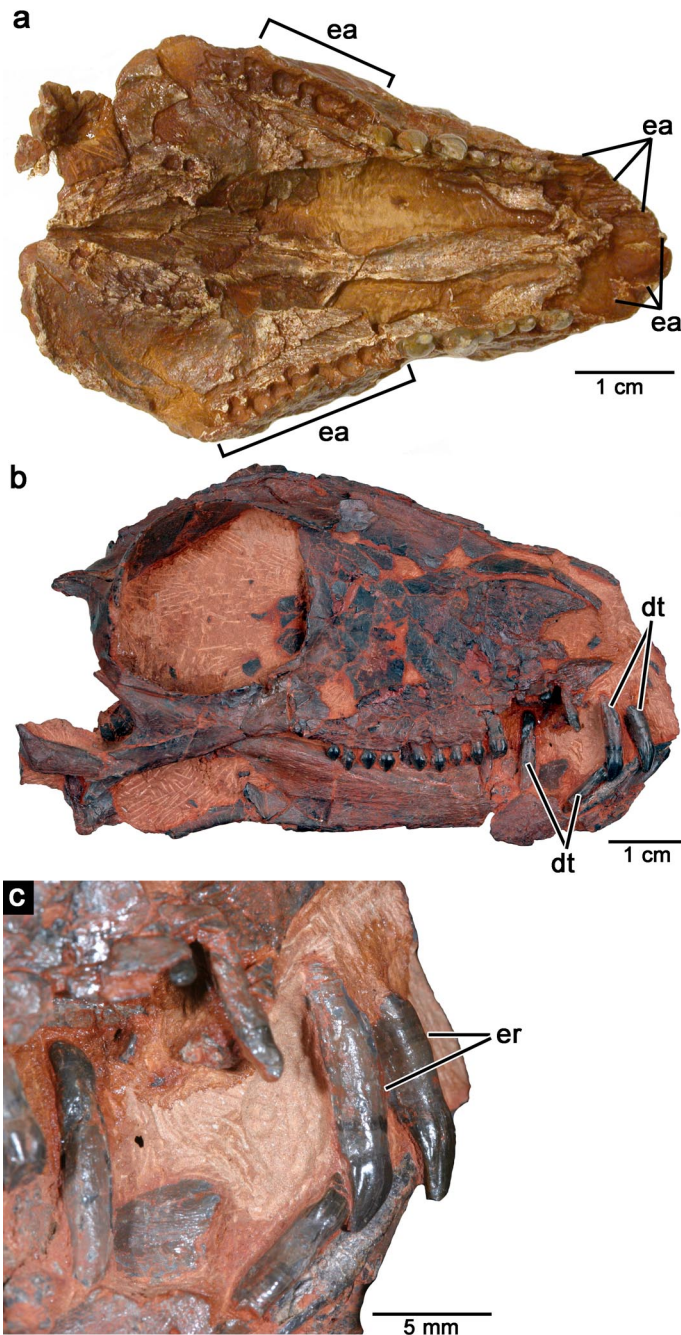

1

2 **Supplementary Figure 5.** Tooth attachment in the biarmosuchian *Niaftasuchus* (images  
 3 provided by D. Scott with permission from R. Reisz). **a**, palatal view of the skull of  
 4 *Niaftasuchus* (PIN 3717/36) showing extensive post-mortem tooth loss, which is  
 5 indicative of ligamentous tooth attachment. **b**, lateral view of the skull of *Niaftasuchus*  
 6 (PIN 162/63) showing displaced teeth, which is indicative of ligamentous tooth



1 attachment. **c**, closeup of premaxillary teeth in **b** showing exposed roots of displaced  
2 teeth. Abbreviations: ea, empty alveoli; dt, displaced tooth; er, exposed root.

3

#### 4 Therapsida: Biarmosuchia

5 No histological data were available for Biarmosuchia. However, the nature of  
6 preservation of some of the cranial material of *Niaftasuchus* Ivachnenko, 1990  
7 (No.3717/36) provide clear insights into tooth attachment in this member of the clade.  
8 *Niaftasuchus* is a poorly known, presumably omnivorous biarmosuchian (R. Reisz, pers.  
9 obs.) from Russia. The teeth possess long roots and elaborate incisiform and  
10 postcaniniform crowns. In both specimens, several teeth have been displaced post-  
11 mortem or were lost completely (Suppl. Fig. 5). The sheer number of teeth that were lost  
12 in one skull (Suppl. Fig. 5a) indicates that the teeth fell out of each alveolus after death  
13 rather than being in the process of being replaced. Furthermore, most of the teeth were  
14 clearly not in the process of being shed at the time of death, given the presence of small  
15 replacement pits lingual to the functional alveoli. Normally, post-mortem tooth loss can  
16 only occur if the teeth were ligamentously attached to the alveoli in life. The displaced  
17 teeth in the second skull (Suppl. Fig. 5b, c) show that the roots of each tooth were not  
18 fused to the alveolar margin. Without histological data, it is not possible to confirm that  
19 the teeth did not become ankylosed later in ontogeny, but it is clear that the teeth were  
20 attached by gomphosis for a significant duration of the life of each tooth, unlike the  
21 condition in “pelycosaurs”.

22

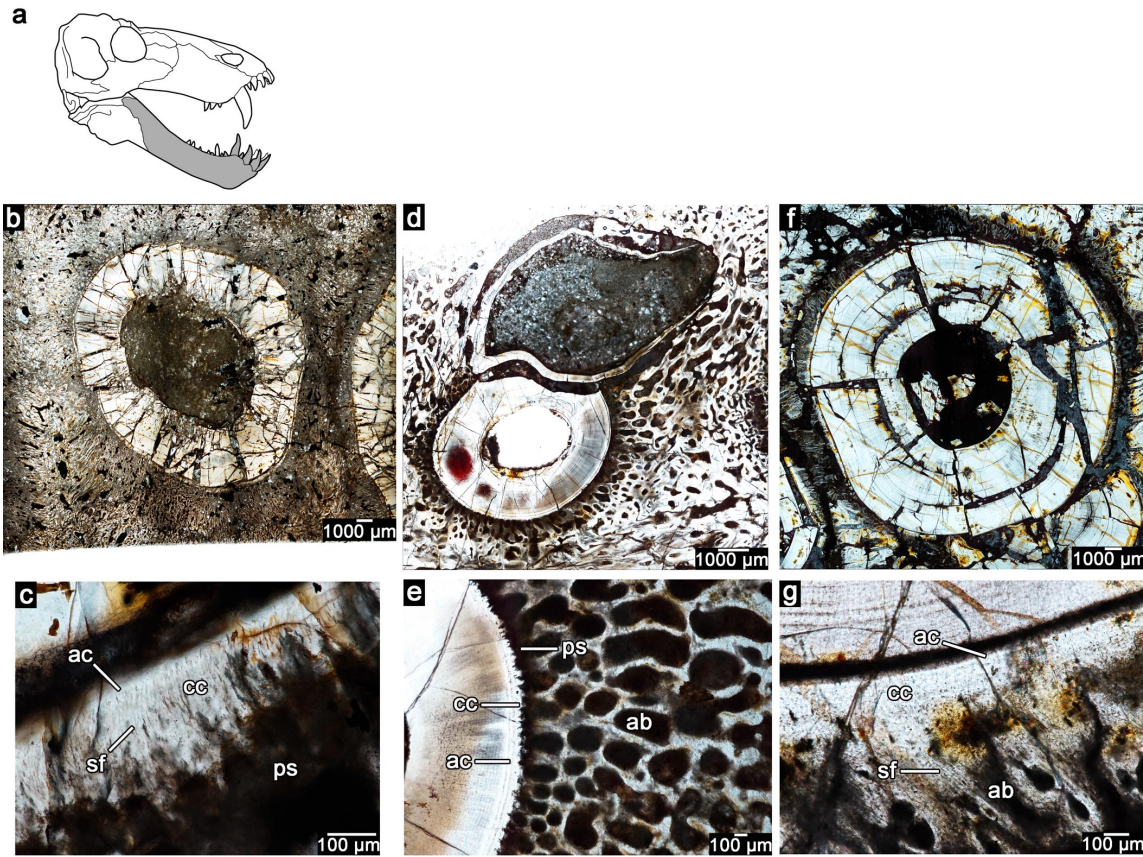

1

2 **Supplementary Figure 6.** Tooth attachment tissues in indeterminate dinocephalians. **a**,  
 3 skull drawing highlighting elements sampled for this study (modified from [11]). **b**,  
 4 closeup of a single, fully ankylosed tooth in a large dinocephalian (BP/1/5417). **c**, closeup  
 5 of the attachment tissues in a neighbouring tooth in BP/1/5417 showing thick layers of  
 6 cellular cementum and Sharpey's fibers from the periodontal ligament. This tooth is not  
 7 ankylosed to the jaw. **d**, closeup of a single, partially ankylosed tooth of a dinocephalian  
 8 (BP/1/6854) that was in the process of being replaced. Note the size discrepancy between  
 9 the old and replacement teeth. **e**, closeup of the attachment tissues of the partially  
 10 ankylosed tooth in **d**. **f**, closeup of a single, partially ankylosed dentary tooth of a  
 11 dinocephalian (BP/1/4851). **g**, closeup of attachment tissues of the same tooth as in **f**,  
 12 showing extensive cellular cementum and Sharpey's fibers. Abbreviations: ab, alveolar  
 13 bone; ac, acellular cementum; cc, cellular cementum; ps, periodontal space; sf, Sharpey's  
 14 fibers.

15

## 1 Therapsida: Dinocephalia Indet.

2 Three indeterminate dinocephalians from the Beaufort Group of South Africa  
3 were sampled, one of which was described in detail previously [12]. The teeth of these  
4 specimens are at various stages of gomphosis and ankylosis (Suppl. Fig. 6). A thin,  
5 featureless band of acellular cementum and a thicker, outer layer of cellular cementum  
6 immediately surround the dentine of each tooth. Overall, the boundary between cellular  
7 cementum and alveolar bone is much clearer in therapsids compared to “pelycosaurs”.  
8 The cellular cementum in these dinocephalians contains cell lacunae entombed in an  
9 avascular, calcified matrix that are arranged into concentric layers (Suppl. Fig. 6c, e, g).  
10 In some specimens, (e.g., BP/1/6854) Sharpey’s fibers extend across the cellular  
11 cementum in plain-polarized light, indicating the attachment sites of the periodontal  
12 ligament (Suppl. Fig. 6c, g). The Sharpey’s fibers are highly organized and extend  
13 parallel to each other across the cellular cementum, similar to the case in modern  
14 mammals. The cellular cementum comes in direct contact with the surrounding alveolar  
15 bone in some teeth, whereas other teeth were clearly suspended within the socket (Suppl.  
16 Fig. 6f).

17 The surrounding alveolar bone is a micro-cancellous bone tissue with a woven  
18 matrix under cross-polarized light, suggesting rapid bone deposition. Some of the tooth  
19 positions record teeth that are only partially ankylosed to the surrounding alveolar bone,  
20 presumably representing intermediate stages between full gomphosis or ankylosis. The  
21 surrounding alveolar bone nearly makes contact with the cellular cementum in some  
22 areas of these teeth, whereas it clearly makes contact with the cementum in other areas.  
23 The cellular cementum coating these teeth has a frayed external surface, indicative of  
24 irregular mineralization along the cementum surface (Suppl. Fig. 6d, e). From these data,  
25 the erupted teeth of these dinocephalians probably were initially attached by periodontal  
26 ligament to the socket margins only to later become ankylosed to the alveolar bone via  
27 mineralization of the ligament. At all stages, however, cementum, alveolar bone, and  
28 periodontal ligament are visible in thin section.

29

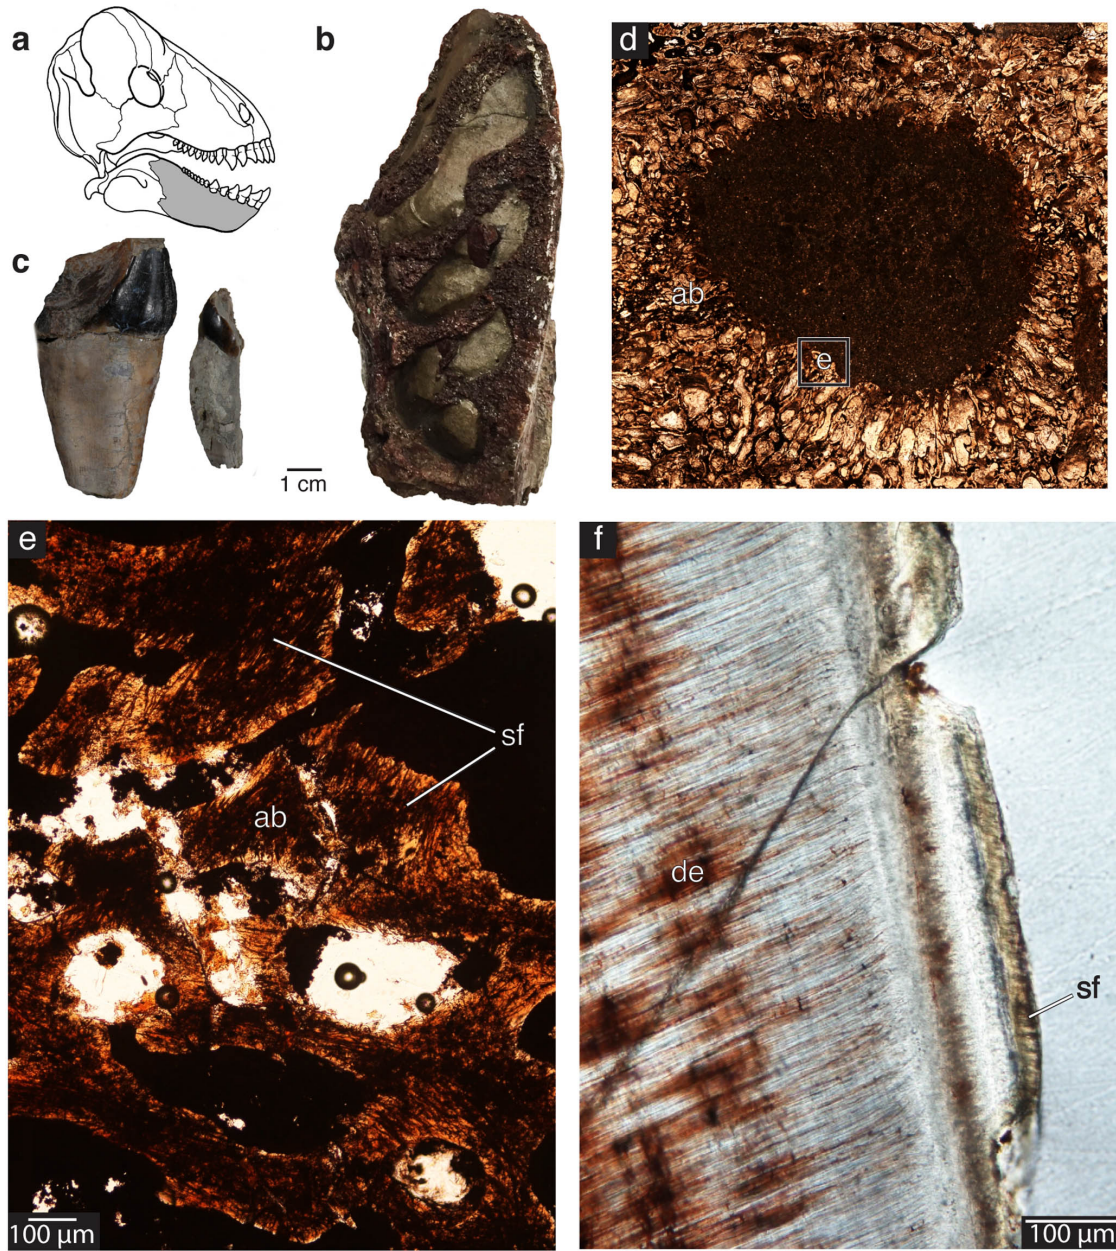

1

2 **Supplementary Figure 7.** Tooth attachment tissues in tapinocephalid dinocephalians. **a**,  
 3 skull drawing highlighting elements sampled for this study (modified from [11]). **b**,  
 4 example of an edentulous partial anterior tapinocephalid dentary (NHCC LB370). **c**,  
 5 isolated teeth with intact roots (NHCC LB734, LB735). **d**, transverse section of an empty  
 6 tooth socket from the posterior portion of dentary (NHCC LB370). **e**, closeup of alveolar  
 7 bone surrounding tooth socket with Sharpey's fibers. **f**, coronal section of an isolated

1 incisor (NHCC LB733) with Sharpey's fibers in the outer cementum layer of the root.  
2 Abbreviations: ab, alveolar bone; de, dentine; sf, Sharpey's fibers.

3

#### 4 Therapsida: Dinocephalia: Tapinocephalidae

5           Several tapinocephalid dinocephalians from the Lower Madumabisa Formation of  
6 Southern Zambia were sectioned. None of the jaws recovered from this area preserve  
7 teeth in-situ and as such, edentulous jaws (Suppl. Fig. 7) and isolated teeth (Suppl. Fig. 7)  
8 were thin-sectioned to examine tissues related to attachment. The teeth reveal a layer of  
9 cementum lining the roots although the preservation does not provide details on the the  
10 composition and anatomical order of cellular/aceullar cementum. However, preserved in  
11 the cementum are densely organized Sharpey's fibers that run parallel to one another  
12 indicating the attachment of a periodontal ligament (Suppl. Fig. 7). The empty sockets of  
13 tapinocephalid jaws are lined by alveolar bone that is highly vascularized primary woven  
14 bone (Suppl. Fig. 7). Embedded within the alveolar bone just adjacent tooth sockets are  
15 abundant Sharpey's fibers, often organized into bundles where fibers run parallel to each  
16 other. The appearance of Sharpey's fibers in both cementum and alveolar bone, as well as  
17 the prevalence of toothless jaws and isolated teeth with intact roots in the tapinocephalid  
18 fossil record provide evidence of a permanent gomphosis in these dinocephalians.

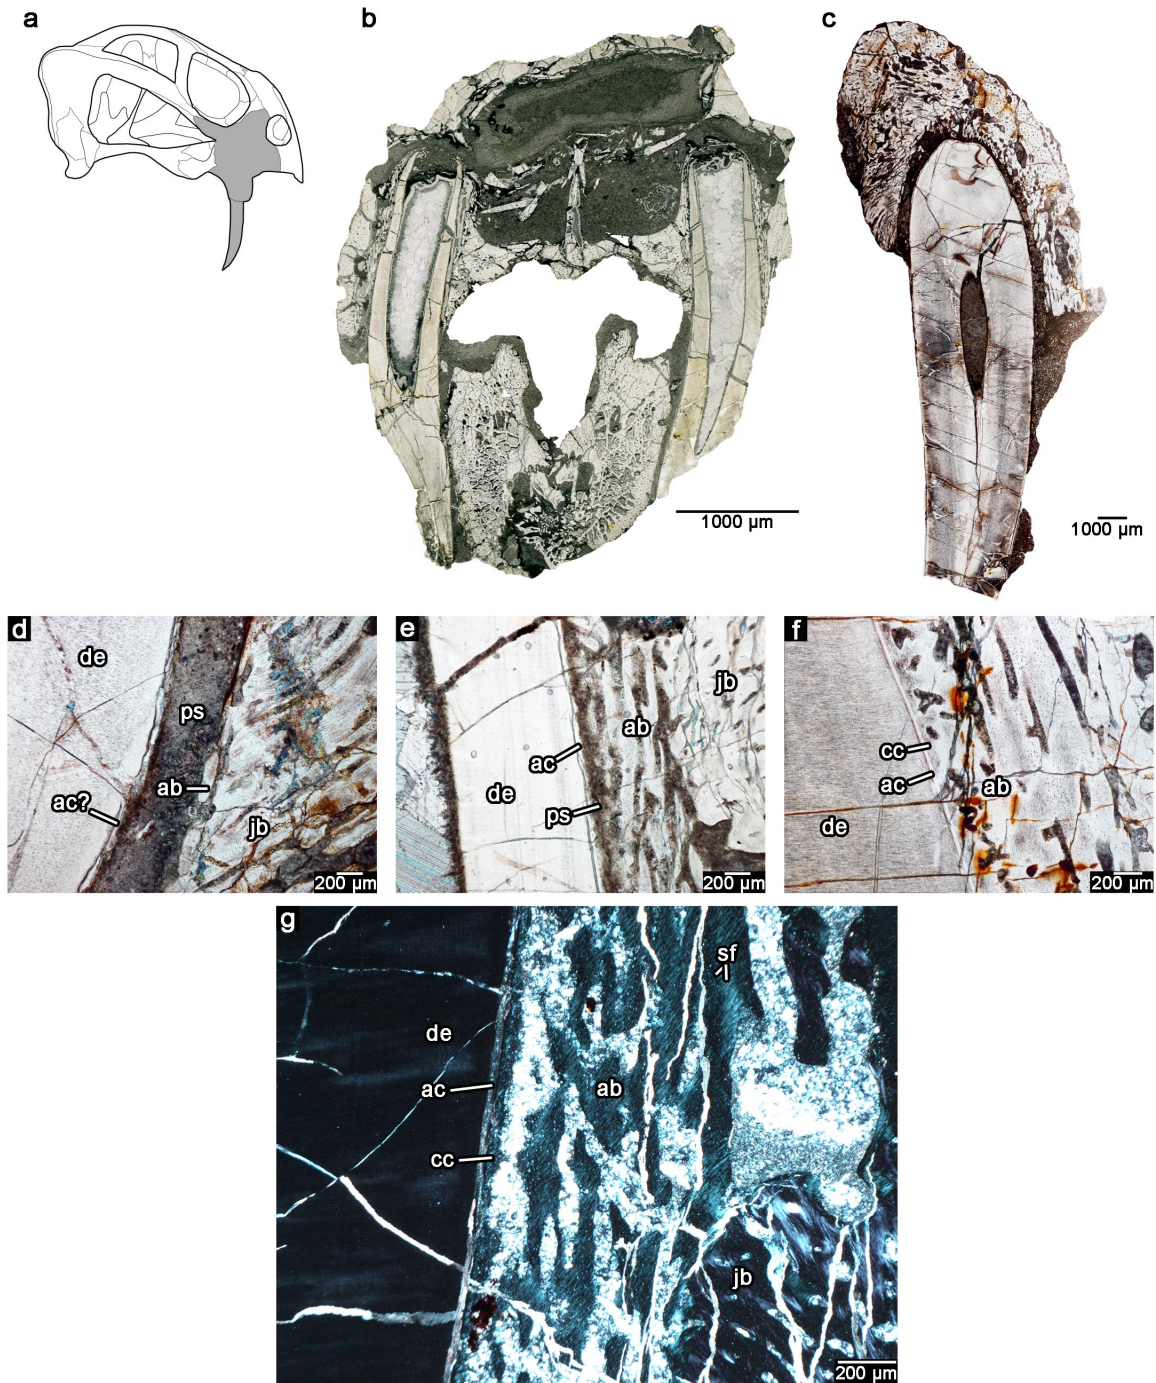

1  
 2 **Supplementary Figure 8.** Tusk attachment tissues in the dicynodont (Anomodontia)  
 3 *Diictodon*. **a**, skull drawing highlighting the elements sampled in this study (modified  
 4 from [13]. **b**, wholeview of a coronal section through the maxillary tusks and lower jaw of  
 5 *Diictodon* (“*Diictodon A*”, ROM 52624). **c**, wholeview of a coronal section through a  
 6 maxillary tusk of *Diictodon* (“*Diictodon C*”, ROM 52624) showing a gomphosis  
 7 attachment. **d**, closeup image of same tooth as in c showing extensive periodontal space

1 between the tooth root and surrounding alveolar bone (crown tip is towards the top). **e**,  
 2 closeup of tooth attachment tissues of same section as in **b** showing partial closure of  
 3 periodontal space by alveolar bone (crown tip is towards the top). **f**, closeup image of a  
 4 completely ankylosed tooth in a third specimen (“*Diictodon B*”, ROM 52624) (crown tip  
 5 is towards the top). **g**, tooth attachment tissues in the same ankylosed tooth under cross-  
 6 polarized light (crown tip is towards the top). Abbreviations: ab, alveolar bone; ac,  
 7 acellular cementum; cc, cellular cementum; de, dentine; jb, jawbone; ps, periodontal  
 8 space; sf, Sharpey’s fibers.

9

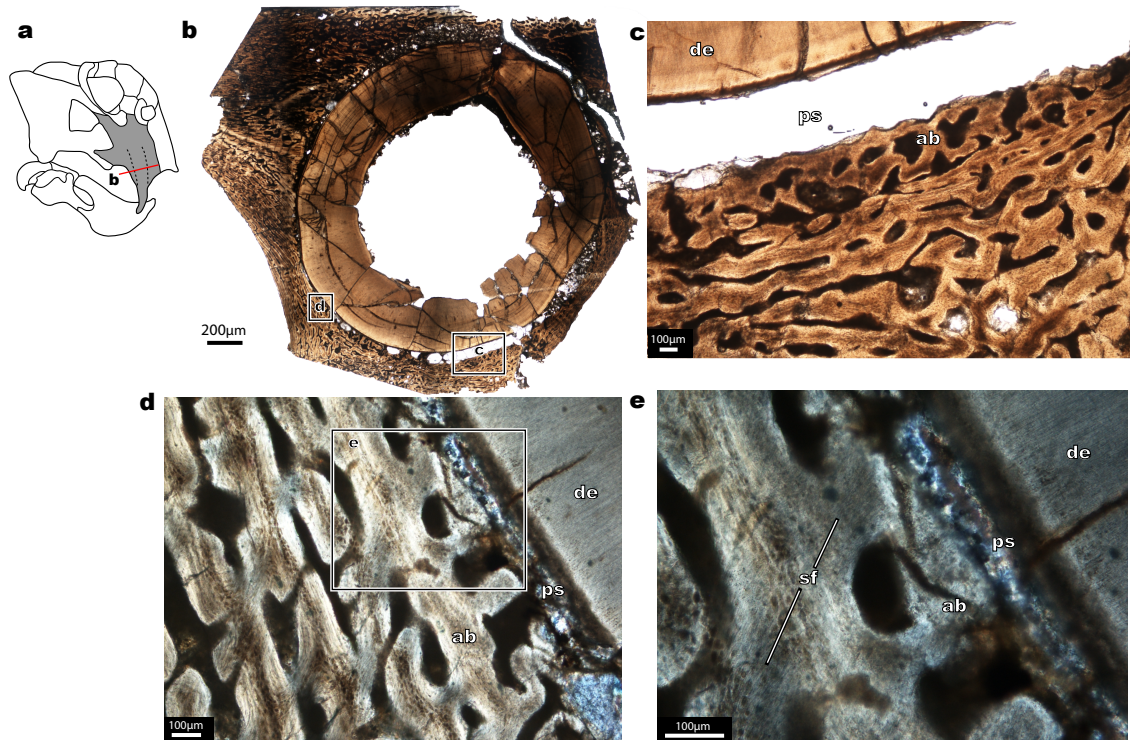

10

11 **Supplementary Figure 9.** Maxillary tusk histology of *Lystrosaurus* (UWBM 109908)  
 12 with evidence of a permanent gomphosis. **a**, skull representing where sections were taken  
 13 for this study. **b**, transverse section of tusk with surrounding alveolar bone. **c**, close-up of  
 14 the lateral margin of the tusk with a wide periodontal space evident between the dentine  
 15 of the tusk and the alveolar bone of the jaw. **d**, close up of a more mesial/distal margin of  
 16 UWBM 109908 under cross polarized light with a narrower periodontal space. **e**, close-

1 up of **d** under cross polarized light with Sharpey's fibers embedded in the alveolar bone.  
2 Abbreviations: ab, alveolar bone; de, dentine; ps, periodontal space; sf, Sharpey's fibers.

3

#### 4 Therapsida: Anomodontia

5 Thin sections of the dicynodonts *Diictodon* and *Lystrosaurus* were made for  
6 comparisons of two dicynodont anomodonts. Early anomodonts possessed highly  
7 specialized dentitions and exhibited sophisticated patterns of dental occlusion, whereas  
8 dicynodont jaws were commonly almost edentulous [1]. In place of an occluding  
9 dentition, dicynodonts possessed keratinous beaks and at least one pair of maxillary  
10 tusks, which may not have been involved in feeding [13].

11 Several longitudinal sections of the tusks of three specimens of the Late Permian  
12 dicynodont *Diictodon* were used for this study (Suppl. Fig. 8; Suppl. Table 1). These  
13 tusks were deeply implanted, with long roots and enamel-covered crowns, similar to the  
14 enlarged canines of many mammals. Thin sections of the tusks in multiple specimens  
15 reveal two types of tooth attachment in *Diictodon*: tusks that are deeply implanted and  
16 ankylosed to the maxilla (Suppl. Fig. 8b) and those that are seemingly floating in a deep  
17 alveolus (Suppl. Fig. 8c). In both types of implantation, the dentine of the tooth root is  
18 coated in a very thin layer of acellular cementum.

19 In the ankylosed teeth, the acellular cementum band contacts a layer of highly  
20 vascularized woven bone. Most of the vascular spaces of this bone tissue extend parallel  
21 to the apical-occlusal axis of the tooth. This tissue also contains abundant Sharpey's  
22 fibers, best viewed under cross-polarized light, which are angled towards the tooth root  
23 (Suppl. Fig. 8g). These fibers represent the mineralized portions of the periodontal  
24 ligament and are present throughout. Most of this bone tissue is here considered to be  
25 alveolar bone, because it forms the entire alveolus and is separated from the fibrolamellar  
26 bone of the jaw by a reversal line. Other specimens of *Diictodon* possess a periodontal  
27 space, where the cementum of the tooth root does not come into contact with the  
28 surrounding alveolar bone (Suppl. Fig. 8c–e). Sharpey's fibers along the alveolar bone



1 and cementum of the tooth root mark the points of insertion of the ligament. The presence  
2 of a periodontal space in erupted teeth such as these indicates that an unmineralized  
3 periodontal ligament was present, making this a true gomphosis, prior to the teeth  
4 becoming fused to the jaws. The width of the periodontal space also appears to vary in  
5 the three specimens that were examined. The surrounding alveolar bone layers probably  
6 grew centripetally during the ontogeny of each tooth, eventually contacting a very thin  
7 layer of cementum coating the tooth root (Suppl. Fig. 8f). These results suggest that  
8 *Diictodon* teeth progressed through successive stages of gomphosis, mineralization, and  
9 ultimately ankylosis, all of which are visible in thin section.

10           The sections of a maxillary tusk of *Lystrosaurus* (UWBM 109908) show a true  
11 gomphosis (Suppl. Fig. 9). Each tooth is seemingly floating in a socket made of woven  
12 alveolar bone. A network of Sharpey's fibers that mark the insertion points of the  
13 periodontal ligament perforates this surrounding bone layer. The root of the tooth in  
14 *Lystrosaurus* is coated in a thin, dark band of tissue that is distinct from the underlying  
15 dentine, but diagenetic alteration makes it difficult to determine whether or not this is  
16 acellular or cellular cementum.

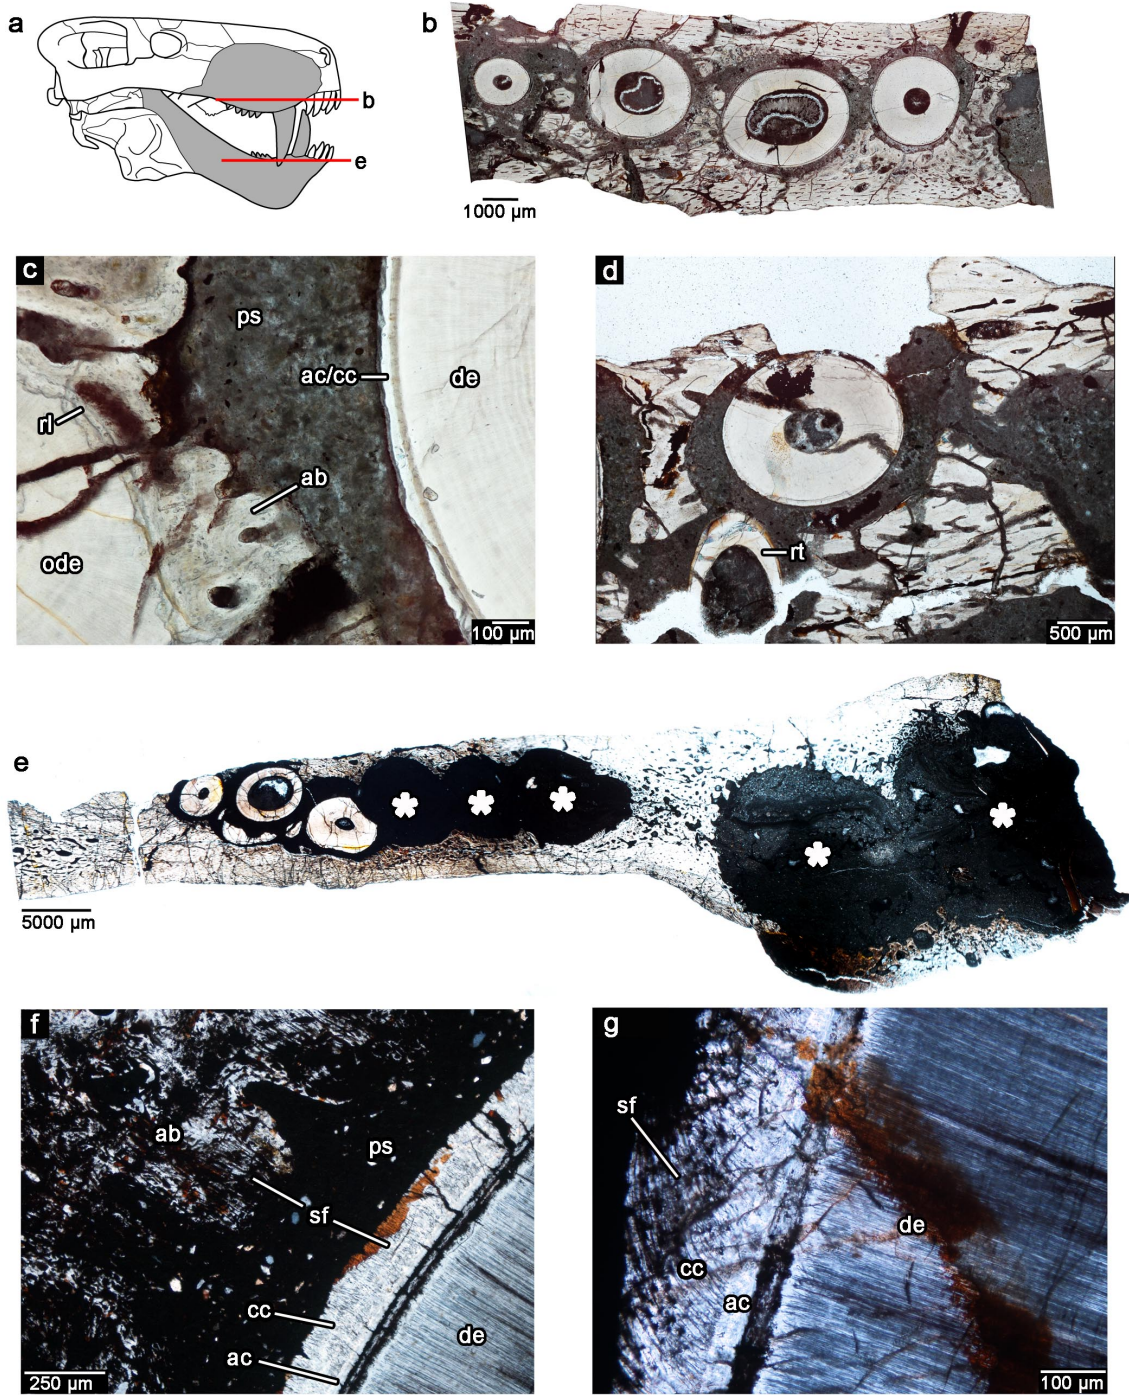

1

2 **Supplementary Figure 10.** Tooth attachment tissues in Gorgonopsia. **a**, skull drawing of  
 3 a gorgonopsian highlighting elements sampled in this study (modified from [14]). **b**,  
 4 wholeview of transverse section through a partial maxilla (BP/1/2395a), showing that  
 5 none of the teeth were ankylosed to the jaw. **c**, closeup of the tooth attachment tissues in a  
 6 maxillary tooth of BP/1/2395a. Note the presence of a fragment of an old tooth root that

1 has become embedded in the socket wall. **d**, closeup of a single maxillary tooth in  
2 BP/1/2395a showing a mesially displaced replacement tooth. Teeth that were in the  
3 process of being replaced were still attached by gomphosis, indicating that this was a  
4 permanently ligamentous tooth attachment. **e**, wholeview of a gorgonopsian dentary  
5 (BP/1/784) sectioned in transverse aspect. Asterisks mark positions where teeth were lost  
6 post-mortem. **f**, closeup of tooth attachment tissues in NMT RB404 under plain-polarized  
7 light **g**, closeup of NMT RB404 with abundant Sharpey's fibers in the cellular cementum  
8 of the tooth root. Abbreviations: ab, alveolar bone; ac, acellular cementum; cc, cellular  
9 cementum; de, dentine; jb, jawbone; oab, older generation of alveolar bone; ps,  
10 periodontal space; rl, reversal line; rt, replacement tooth; sf, Sharpey's fibers.

11

## 12 Therapsida: Gorgonopsia

13 A partial skull (BP/1/2395a) and a nearly complete dentary (BP/1/748) of two  
14 gorgonopsians from the middle Permian of South Africa, as well as two partial jaws from  
15 the late Permian of Tanzania (NMT RB404) and likely late Permian of Zambia (NHCC  
16 LB367) were sectioned for this study. All of the teeth were attached by gomphosis to the  
17 alveoli (Suppl. Fig. 10). One tooth position in a section through a maxilla preserved a  
18 developing successional tooth that was positioned mesially and lingually to the functional  
19 tooth (Suppl. Fig. 10d). This indicates that the functional tooth at this position was  
20 nearing the end of its lifespan. Functional teeth at comparable stages in "pelycosaur"-  
21 grade synapsids and dinocephalians show complete ankylosis. In gorgonopsids,  
22 gomphosis appears to have been a permanent state for each tooth, which is similar to  
23 mammals.

24 Each post-caniniform tooth root is circular in cross-section and is coated in two  
25 layers of cementum. The most internal layers is a thin featurless band of acellular  
26 cementum that is devoid of Sharpey's fibers or cementocyte lacunae, whereas the  
27 external layer is much thicker, consists of abundant circumferential growth lines,  
28 Sharpey's fibers, and cementocyte lacunae, consistent with cellular cementum (Suppl.

1 Fig. 10f, g). The presence of a non-mineralized periodontal ligament can be inferred by  
2 the presence of a space between the tooth roots and the surrounding alveolar bone, as  
3 well as Sharpey's fibers in the cementum and alveolar bone (Suppl. Fig. 10f, g). Clear  
4 instances of post-mortem tooth loss (Suppl. Fig. 10e) also support the presence of a  
5 ligamentous tooth attachment. Several of the teeth in the dentary sections are missing, but  
6 the surrounding alveolar bone is well developed and contains dense networks of  
7 Sharpey's fibers, marking the insertion points of the periodontal ligament. These teeth  
8 were clearly lost after decay of the periodontal ligament and were not in the process of  
9 being replaced. Alveolar bone in gorgonopsians consists of a well-vascularized, primary  
10 woven bone matrix that is separated by the surrounding hard tissues by a reversal line,  
11 indicating resorption prior to deposition of new layers of alveolar bone (Suppl. Fig. 10c,  
12 f, g). Along one tooth position, the alveolar bone has partially resorbed the root of an old  
13 tooth, leaving behind a fragment of dentine between two tooth positions (Suppl. Fig.  
14 10c).

15

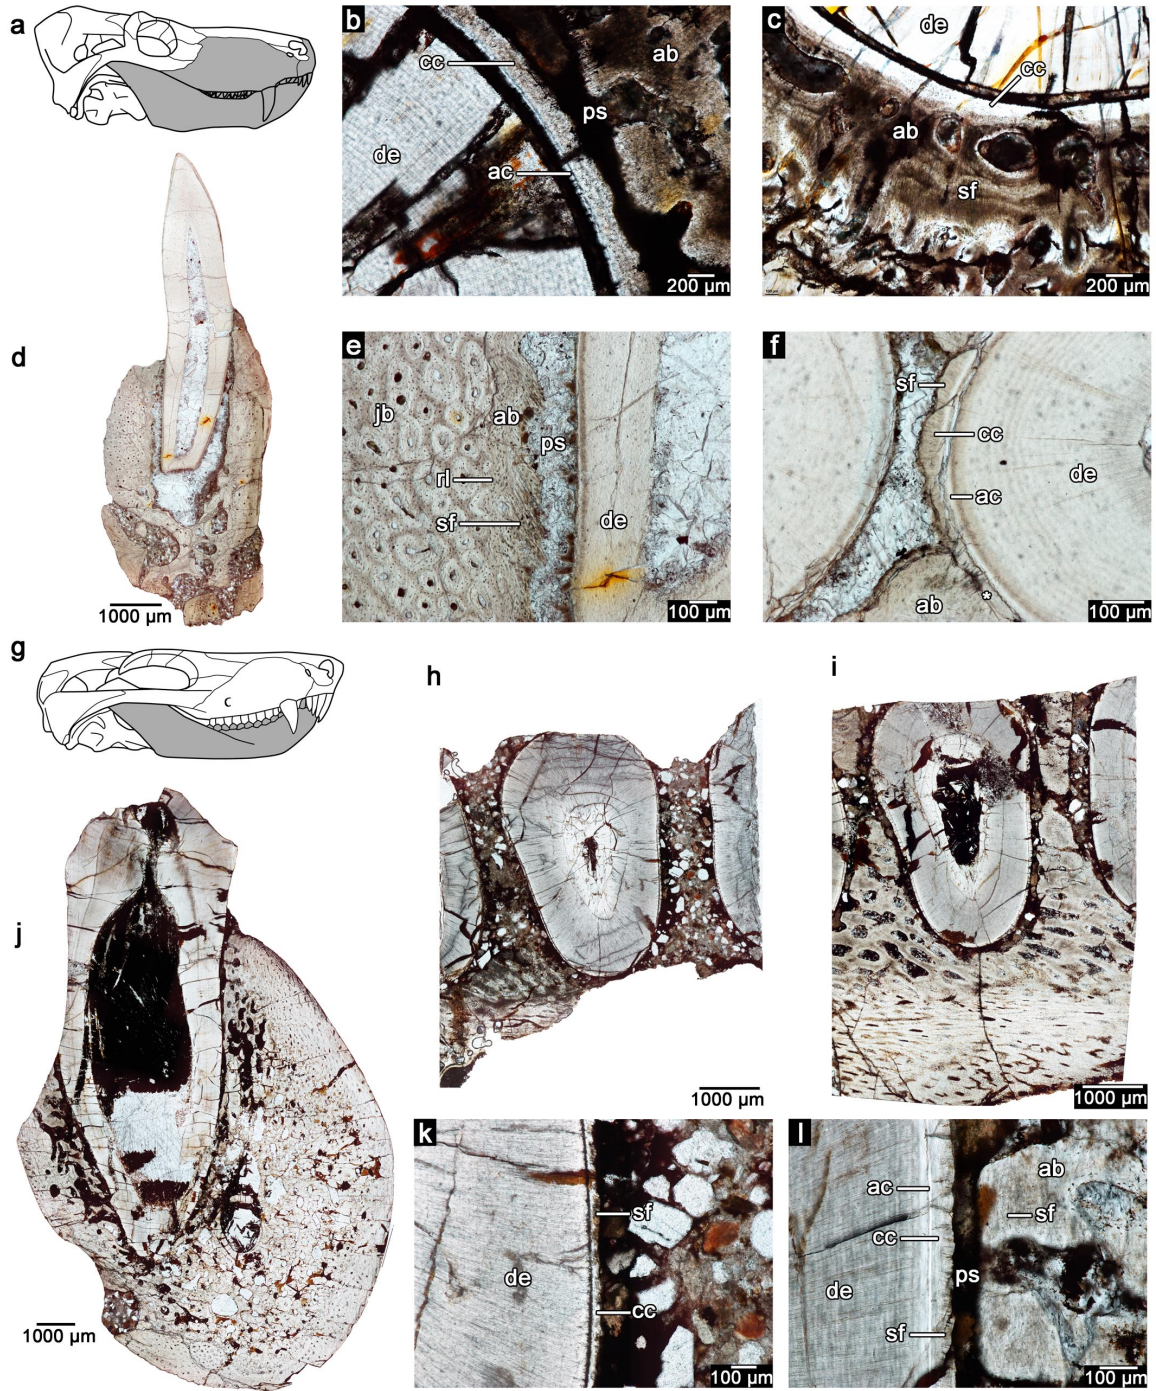

1

2 **Supplementary Figure 11.** Tooth attachment in Therocephalia. **a**, skull drawing of a  
 3 carnivorous therocephalian highlighting elements sampled in this study (modified  
 4 from[15]. **b**, closeup of the tooth attachment tissues in an indeterminate therocephalian  
 5 (BP/1/7257) exhibiting a gomphosis. **c**, closeup of tooth attachment tissues in a  
 6 neighbouring tooth of the same specimen as **b** showing complete ankylosis via inward

1 growth of alveolar bone. **d**, wholeview of a single therocephalian dentary tooth sectioned  
2 in coronal aspect showing a gomphosis (BP/1/172). **e**, closeup of dental attachment  
3 tissues of same tooth in **d**. **f**, closeup of tooth attachment tissues between two teeth in the  
4 same specimen (BP/1/172) but in transverse view. Asterisks indicates apparent ankylosis,  
5 but this is probably due to post-mortem displacement of the tooth. **g**, skull drawing of  
6 *Bauria* highlighting element sampled in this study (modified from [15]). **h**, closeup of a  
7 single dentary tooth root of *Bauria* sectioned in transverse aspect just above the jaw  
8 margin (BP/1/2523). **i**, closeup of same tooth as in **h** sectioned far below the alveolar  
9 margin. Note the presence of a clear periodontal space. **j**, wholeview of a dentary tooth of  
10 BP/1/2523 showing gomphosis-type tooth attachment in coronal aspect. **k**, closeup of  
11 root cementum and Sharpey's fibers of the tooth imaged in **h**. **l**, closeup of root cementum  
12 and Sharpey's fibers of the tooth imaged in **i**. The cellular cementum is significantly  
13 thicker towards the root apex. Abbreviations: ab, alveolar bone; ac, acellular cementum;  
14 cc, cellular cementum; de, dentine; jb, jawbone; ps, periodontal space; rl, reversal line; sf,  
15 Sharpey's fibers.

16

## 17 Therapsida: Therocephalia indet. + *Moschorhinus kitchingi*

18 We sampled two indeterminate therocephalians from the Beaufort Group of South  
19 Africa (Suppl. Fig. 11), and examined a cut and polished skull preserving the canines of  
20 *Moschorhinus kitchingi* (BP/1/2788). Two of these specimens (BP/1/7257 and  
21 BP/1/2788) possessed both teeth that were ankylosed to the jaws as well as teeth that  
22 were attached by gomphosis (Suppl. Fig. 11b, c; Suppl. Table 2). Teeth that were  
23 ankylosed showed regional differentiation of the surrounding bony tissue. The layers  
24 immediately surrounding the acellular cementum of the tooth root possess concentric  
25 growth lines and well-stratified layers of cell lacunae (Suppl. Fig. 11b) and it is  
26 histologically identical to cellular cementum in other taxa. The cellular cementum in  
27 BP/1/7257 is a different colour from the surrounding spongy bone (Suppl. Fig. 11c),  
28 providing a clear demarcation between cementum and the surrounding alveolar bone in  
29 ankylosed teeth. Based on the different stages of tissue development along the jaws of

1 this specimen, it is clear that teeth were initially attached by gomphosis, only to later  
2 become ankylosed by centripetal growth of alveolar bone [12].

3 The other indeterminate therocephalian specimen (BP/1/172) exhibits a different  
4 form of tooth attachment. All of the teeth in both dentaries were attached by gomphosis  
5 to the socket margins (Suppl. Fig. 11d–f). The dentine of each tooth is coated in a thin  
6 band of acellular cementum and a thicker layer of cellular cementum. The alveolar bone  
7 consists of a thin layer of woven bone that is separated from the vascularized bone of the  
8 jaw by a reversal line, indicating the extent of resorption of the previous generations of  
9 alveolar bone (Suppl. Fig. 11e). A well-defined periodontal space as well as extensive,  
10 parallel Sharpey’s fibers in the alveolar bone and cellular cementum indicates that each  
11 tooth was attached by periodontal ligament (Suppl. Fig. 11e, f). Some of the tooth  
12 positions show more extensive centripetal growth of the alveolar bone than others, but  
13 none of them were ankylosed.

14

## 15 Therapsida: Therocephalia: *Bauria*

16 Several coronal and transverse sections were made through a complete dentary of  
17 the derived, herbivorous therocephalian *Bauria* (Suppl. Fig. 11g–l; Supplementary Table  
18 1). These sections revealed that every tooth along the jaw was attached by gomphosis to  
19 the surrounding alveolar bone. Each tooth root was coated in a thin band of acellular  
20 cementum beginning at a level above the alveolar margin. Serial sections of the tooth  
21 roots revealed that cellular cementum coats the acellular cementum further apically and  
22 becomes progressively thicker towards the root apex, as it does in mammals [12]. More  
23 apical sections show that the cellular cementum contains a series of growth lines, which  
24 extend parallel to the root surface. The cellular cementum is perforated by Sharpey’s  
25 fibers, marking the insertion points of the periodontal ligament. Sharpey’s fibers with  
26 similar orientations to those found in the cementum of the root are also found in the  
27 surrounding alveolar bone further apically. The alveolar bone is always separated from  
28 the cellular cementum of the tooth root by a periodontal space in *Bauria* (Suppl. Fig.

1 11h–l). These findings indicate that *Bauria* possessed a periodontium that was nearly  
2 identical to that of modern mammals.

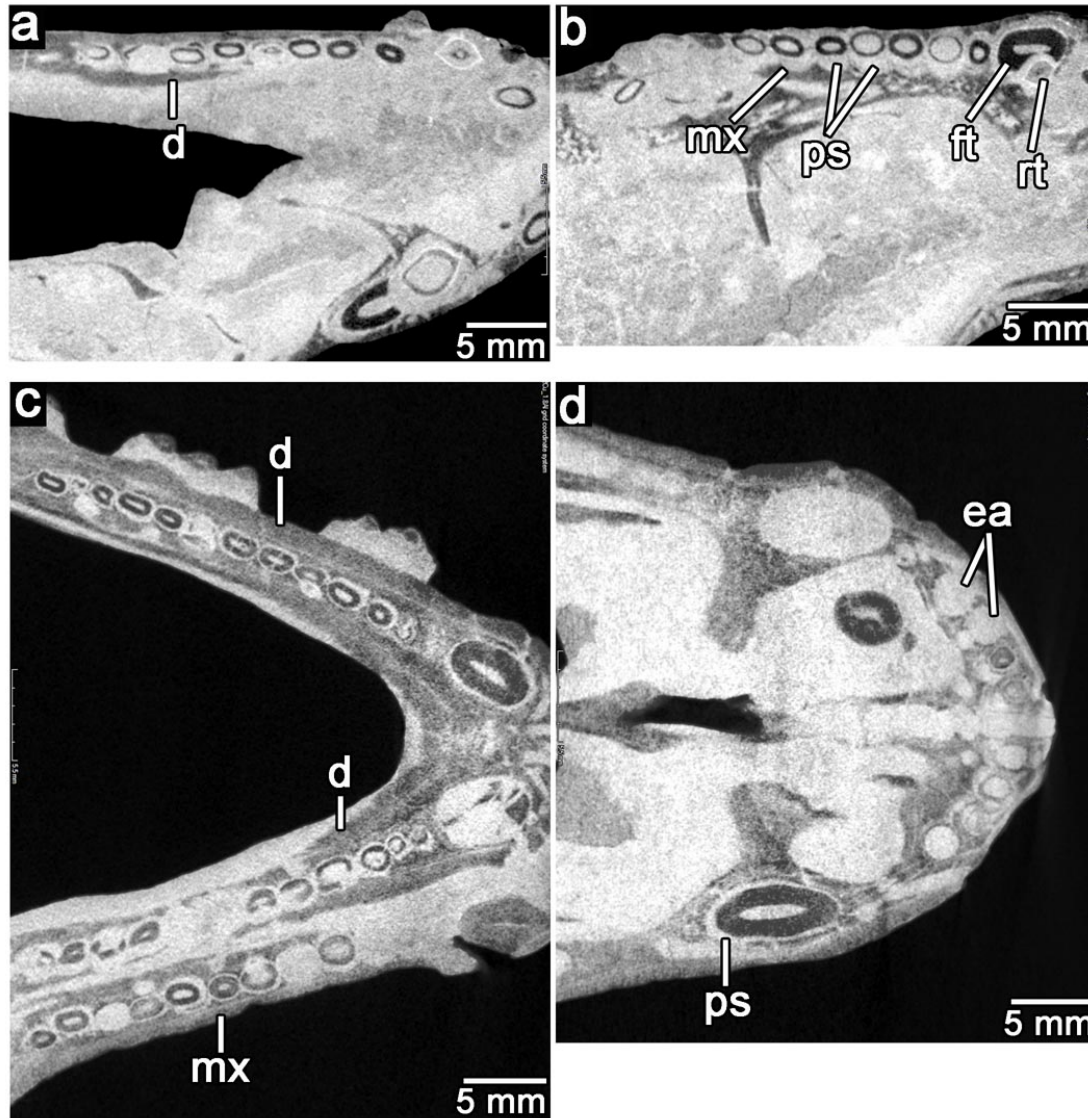

3  
4 **Supplementary Figure 12.** Ontogeny of tooth attachment in the cynodont *Galesaurus*. **a**,  
5 dentary teeth in a subadult specimen (BP/1/4602) showing no evidence of dental  
6 ankylosis. **b**, left maxilla of BP/1/4602, showing no evidence of dental ankylosis. **c**,  
7 dentary adult specimen (BP/1/5064). All teeth were attached by gomphosis. **d**,  
8 premaxillary and anterior maxillary teeth of BP/1/4602 showing gomphosis at each tooth  
9 position.



1

## 2 Therapsida: Cynodontia: *Galesaurus*

3           We examined CT scans of a presumed subadult (BP/1/4602) and a presumed adult  
4 (BP/1/5064) of the Early Triassic cynodont *Galesaurus* (Suppl. Fig. 12) (see [16] for  
5 skull measurements and ontogenetic status assignment). These specimens preserve all of  
6 the upper and lower dentition thus providing a glimpse into possible variation in tooth  
7 attachment mode. Despite numerous documented ontogenetic changes to the skull in  
8 *Galesaurus* [16], the tooth attachment mode between subadult and adult individuals  
9 appears to have been the same. Although we cannot confirm the presence and types of  
10 root cementum present due to the scanning resolution, each tooth root is surrounded by a  
11 clear periodontal space that separates the surrounding spongy alveolar bone from the  
12 tooth root surfaces (Suppl. Fig. 12). The presence of periodontal spaces and numerous  
13 empty alveoli are indicative of a ligamentous tooth attachment. In both the subadult  
14 (Suppl. Fig. 12a, b) and adult (Suppl. Fig. 12c, d) specimens, even functional teeth that  
15 were in the process of being replaced show no evidence of ankylosis. As such, each tooth  
16 was probably attached to the alveolar bone by an uncalcified periodontal ligament  
17 throughout dental ontogeny, similar to modern mammals.

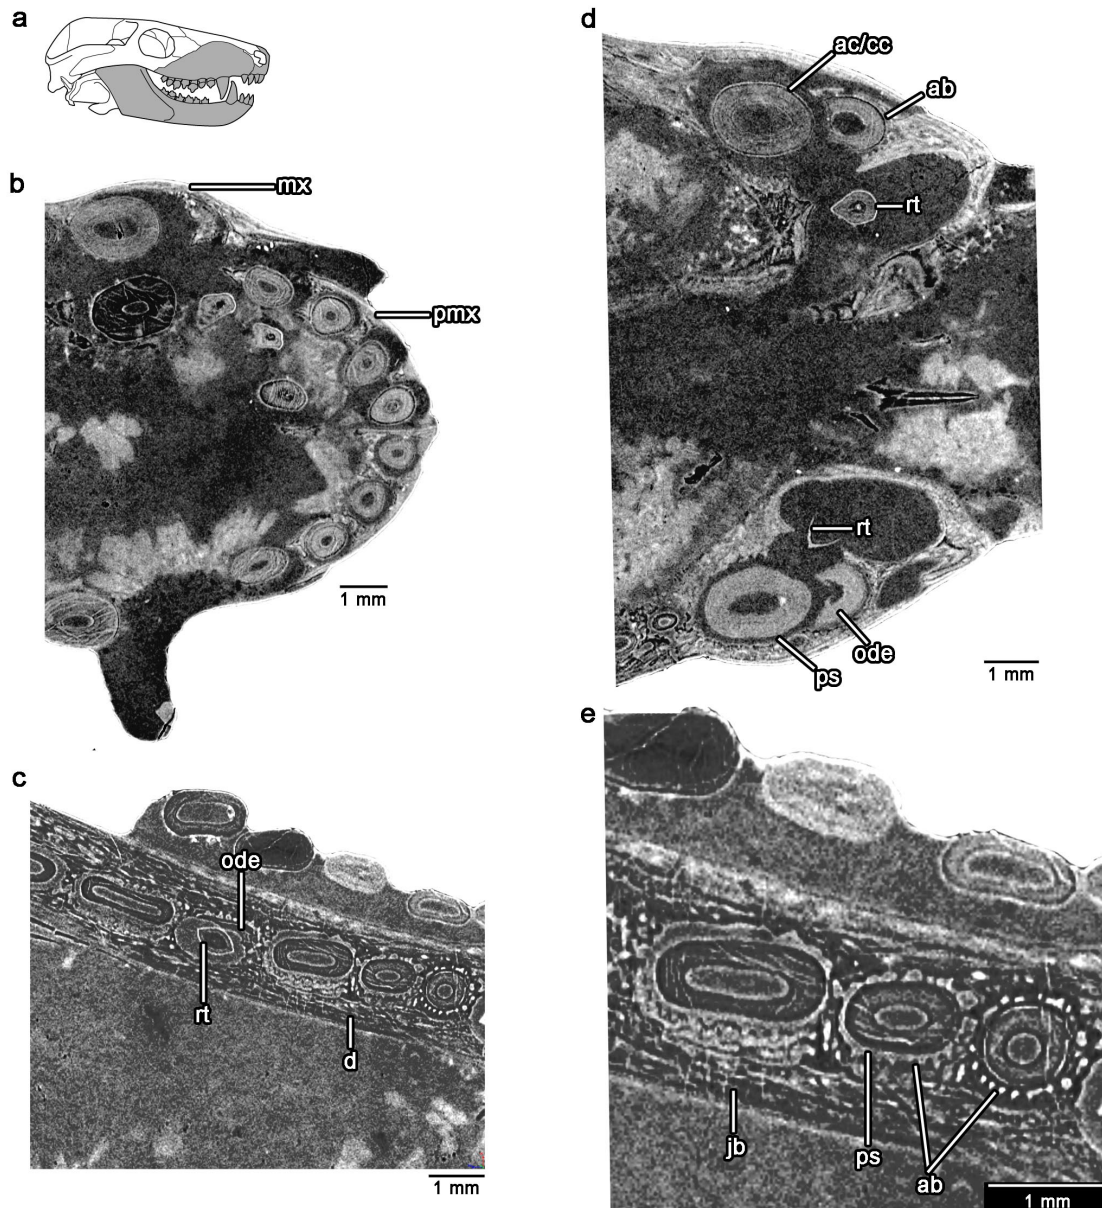

1

2 **Supplementary Figure 13.** Ontogeny of tooth attachment in a small individual  
 3 (BP/1/5372) of the early cynodont *Thrinaxodon*. **a**, skull drawing of *Thrinaxodon*  
 4 highlighting elements examined in this study (modified from [14]). **b**, CT scan image of  
 5 the premaxillary and caniniform tooth roots of BP/1/5372. **c**, closeup of CT scan image of  
 6 lower postcaniniform tooth roots in BP/1/5372. **d**, deeper slice through the premaxillary  
 7 and caniniform tooth roots. Note that most of the teeth are separated from the alveoli by  
 8 periodontal spaces, except for those that are being replaced. **e**, closeup of same image as **c**  
 9 showing teeth at successive stages of attachment tissue development. Alveolar bone

- 1 develops centripetally to enclose the periodontal space and ankylose older teeth.
- 2 Abbreviations: ab, alveolar bone; ac, acellular cementum; cc, cellular cementum; d,
- 3 dentary; jb, jawbone; mx, maxilla; ode, dentine of older tooth; pmx, premaxilla; ps,
- 4 periodontal space; rt, replacement tooth.

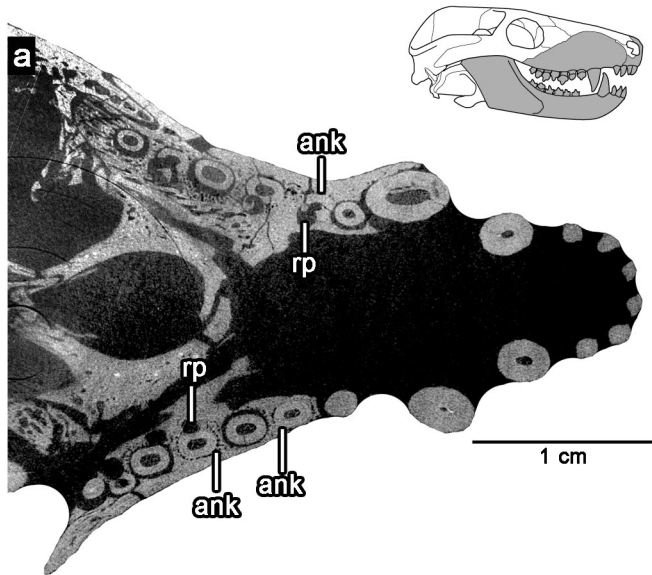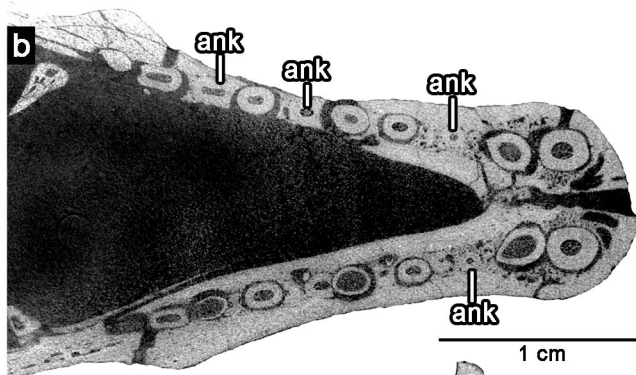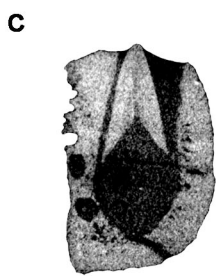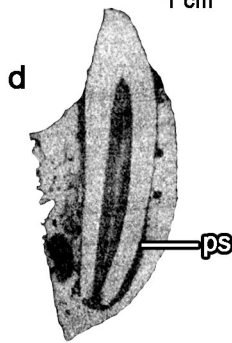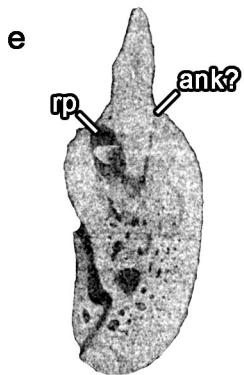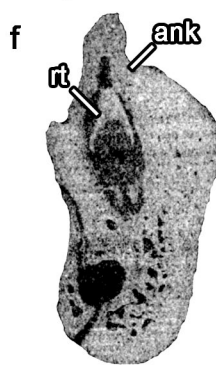

1 **Supplementary Figure 14.** The ontogeny of tooth attachment in a large individual  
2 (BP/1/7199) of the early cynodont *Thrinaxodon*. **a**, CT scan image of tooth attachment in  
3 the upper dentition of BP/1/7199. **b**, CT scan image of tooth attachment in the lower  
4 dentition of BP/1/7199. Some of the teeth possess periodontal spaces, whereas others are  
5 ankylosed to the jaws. **c**, coronal view of an erupting anterior dentary tooth. **d**, coronal  
6 view of an erupted anterior dentary tooth that is attached by gomphosis to the alveolus. **e**,  
7 coronal view of a posterior dentary tooth that is possible ankylosed to the jaws and  
8 exhibits an early stage of replacement. **f**, coronal view of a posterior dentary tooth that is  
9 at an advanced stage of replacement but is clearly ankylosed to the jaws. Abbreviations:  
10 ank, ankylosis; ps, periodontal space; rp, replacement pit; rt, replacement tooth.

11

## 12 Therapsida: Cynodontia: *Thrinaxodon*

13 CT scans of the upper and lower dentition of a small individual (BP/1/5372;  
14 Suppl. Fig. 13) of the Early Triassic cynodont *Thrinaxodon* revealed that nearly all of the  
15 teeth were separated from the surrounding alveolar bone by a periodontal space,  
16 indicating the presence of a ligament that held the teeth in place in life. Cementum coated  
17 the root portions of the teeth, but the nature and relative thicknesses of the acellular and  
18 cellular cementum could not be determined from the scans (Suppl. Fig. 13b–e). Some  
19 sections of the jaws show teeth at different stages of tissue development and clearly show  
20 that the spongy alveolar bone gradually extended centripetally and in some cases,  
21 contacted the cementum of the tooth root to form a stable ankylosis (Suppl. Fig. 13c, e).  
22 Areas in which teeth were actively being replaced by a new tooth showed that the older  
23 tooth was sometimes ankylosed to the surrounding alveolar bone. Some of the tooth  
24 positions, however, show ankylosis without any signs of a replacement tooth, suggesting  
25 that ankylosis occurred earlier in the functional life of the tooth, prior to the onset of root  
26 resorption (Suppl. Fig. 13c, e).

27 CT scans of a larger specimen (BP/1/7199) show similar occurrences of ankylosis  
28 and gomphosis (Suppl. Fig. 14a, b). Most of the erupted teeth in this specimen possess a

1 periodontal space (and therefore a ligament) between the tooth roots and the surrounding  
2 alveolar bone. Teeth that were in the process of being replaced show signs of centripetal  
3 growth of alveolar bone and ankylosis (Suppl. Fig. 14a–f), again indicating that most of  
4 the functional teeth were ankylosed prior to being replaced. This was not universal along  
5 the jaw, however, as some postcanine teeth were still attached by gomphosis at an  
6 advanced stage of being replaced (Suppl. Fig. 14a, b). Even larger individuals show the  
7 same condition, where teeth are ankylosed immediately prior to being replaced [17].  
8 These results suggest that ankylosis occurred at late ontogenic stages for individual teeth  
9 at many tooth positions, regardless of the age of the individual.

10

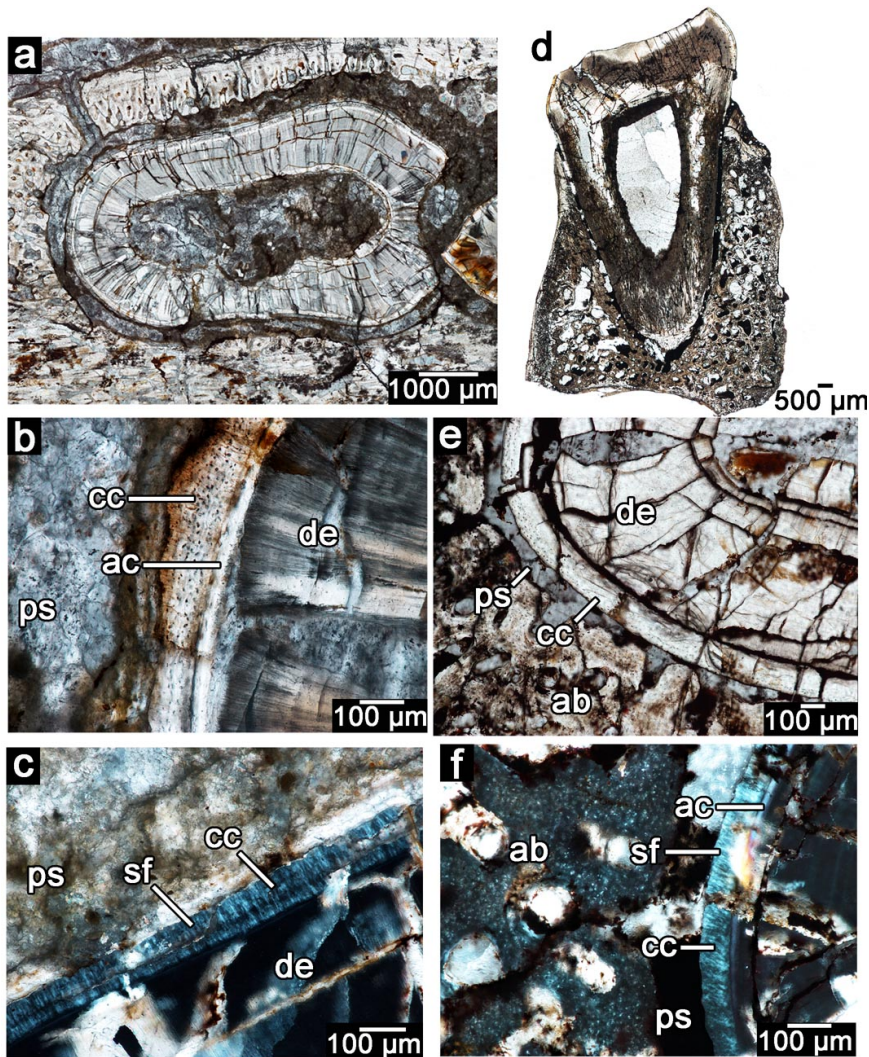

11

1 **Supplementary Figure 15.** Tooth attachment tissues in the cynodonts *Cynognathus* and  
2 *Diademodon*. **a**, closeup of a single tooth in a transverse section through a partial dentary  
3 of *Cynognathus* (BP/1/6097). Deeper sections through this tooth reveal that it was in the  
4 process of being replaced (see Suppl. Fig. 17), suggesting that older teeth in this taxon  
5 were still attached by gomphosis. **b**, closeup of the root cementum in a showing extensive  
6 cellular cementum. **c**, closeup of the root cementum in a under cross-polarized light,  
7 showing the Sharpey's fibers of the periodontal ligament. **d**, wholeview of a coronal  
8 section through a nearly complete maxilla of *Diademodon* (BP/1/4652). The tooth is  
9 separated from the alveolar wall by a periodontal space, indicating a ligamentous tooth  
10 attachment. **e**, closeup of the attachment tissues in a transverse section through  
11 BP/1/4652. **f**, closeup of same tooth in e under cross-polarized light, showing Sharpey's  
12 fibers of the periodontal ligament.

13

#### 14 Therapsida: Cynodontia: *Cynognathus* and *Diademodon*

15 It was possible to section a partial jaw tentatively assigned to the non-mammalian  
16 eucynodont *Cynognathus* based on the morphology of the postcanine teeth and a nearly  
17 complete maxilla of the closely related form *Diademodon* with in-situ postcanines  
18 (Suppl. Fig. 15; Supplementary Table 1). Additional thick sections through a skull of  
19 *Diademodon* (BP/1/1171) were also examined (Supplementary Table 2). The teeth of all  
20 three specimens are all suspended in the sockets and are not fused to the alveolar  
21 margins. The tooth roots of *Cynognathus* and *Diademodon* are all coated in a well-  
22 defined, thin band of clear, acellular cementum, and multiple layers of cellular cementum  
23 (Suppl. Fig. 15b–f). Each layer of cellular cementum is separated by a growth line and  
24 contains rows of flattened cementocyte lacunae. The cellular cementum contains an  
25 abundance of Sharpey's fibers that are best viewed under cross-polarized light, indicating  
26 the presence of a periodontal ligament (Suppl. Fig. 15c, f). A mineral-filled space persists  
27 around all of the tooth roots in both specimens. The surrounding bone is a primary, well-  
28 vascularized bone matrix that is perforated by Sharpey's fibers with similar orientations  
29 to those in the cellular cementum. This bone is separated from the surrounding bone of

1 the jaw by a reversal line. These observations indicate that, unlike the condition in  
2 *Thrinaxodon*, but similar to *Galesaurus*, the teeth of *Cynognathus* and *Diademodon* were  
3 attached by gomphosis. None of the teeth in *Diademodon* or *Cynognathus* showed  
4 evidence of dental ankylosis, indicating that ligamentous attachment in these cynodonts  
5 was probably permanent, similar to mammals.

6

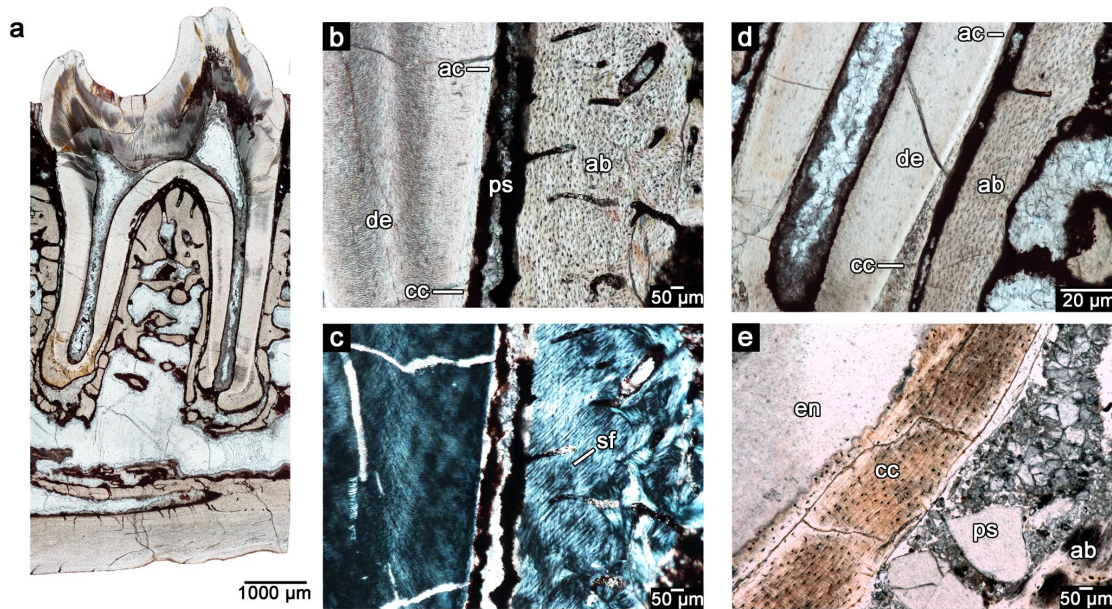

7

8 **Supplementary Figure 16.** Mammalian tooth attachment tissues. **a**, closeup of a single  
9 tooth in a longitudinal section through the partial jaw of the condylarth *Hyopsodus*  
10 (USNM 595273). Note the presence of a periodontal space, which housed the periodontal  
11 ligament in life. **b**, closeup of the attachment tissues in USNM 595273. **c**, Same image as  
12 b under cross-polarized light, highlighting the Sharpey's fibers of the periodontal  
13 ligament. **d**, closeup image of the attachment tissues in an extracted human molar (ROM  
14 R9245). **e**, closeup image of the coronal cementum of an in-situ horse tooth (ROM  
15 33036). Abbreviations: ab, alveolar bone; ac, acellular cementum; cc, cellular (and  
16 coronal) cementum; de, dentine; en, enamel; gzd, globular zone of dentine; ps,  
17 periodontal space; sf, Sharpey's fibers.

18



# 1 Mammalia

2 We examined thin sections of a fossil condylarth *Hyopsodus* (USNM 595273) and  
3 a horse, *Equus sp.* (ROM 33036) (Suppl. Fig. 16). In nearly all mammals, the dentine of  
4 the tooth root is coated in several layers of acellular cementum [18]. Unlike the condition  
5 in non-mammalian synapsids, acellular cementum is not always covered by cellular  
6 cementum and the former tissue may form the principal attachment site for the  
7 periodontal ligament [18] (Suppl. Fig. 16a–c). By comparison, in non-mammalian  
8 synapsids, and in amniotes in general, this role is accomplished by the cellular cementum.  
9 Cellular cementum in mammals is typically restricted to the apical third of the root and is  
10 only a minor contributor to periodontal ligament attachment (Suppl. Fig. 16d). However,  
11 a major exception to this occurs in ever-growing and high-crowned (hypsodont) teeth  
12 (Suppl. Fig. 16e). In both cases, extensive layers of cellular cementum, perforated by  
13 parallel Sharpey’s fibers, form the principal sites of attachment to the periodontal  
14 ligament.

15 Alveolar bone in mammals is variably woven, parallel-fibered, or lamellar bone,  
16 depending on the age of the tooth and the age of the individual [18]. The bone layer  
17 closest to the periodontal space always consists of a primary bone matrix perforated by  
18 coarse Sharpey’s fiber bundles from the periodontal ligament and is thus termed the  
19 bundle bone layer. These Sharpey’s fibers are best viewed under cross-polarized light and  
20 are neatly arranged into parallel groups extending towards the periodontal space (Suppl.  
21 Fig. 16c). In fossil and modern material, the periodontal ligament decays and its position  
22 is marked by a space between the cementum of the tooth root and the bundle bone of the  
23 alveolus (Suppl. Fig. 16b–e).

24

25 **Supplementary Information S2: Character construction and**  
26 **ancestral character state reconstruction**

1 Three character states for a single new character were constructed, based on the  
 2 observed variations in the proportion of time teeth of a given taxon were found in one of  
 3 the four stages of dental ontogeny (main text Figure 3). The following character states  
 4 were used:

5 State 0: Functional gomphosis absent and ankylosis present. Teeth are almost always  
 6 found in section as completely ankylosed or in the process of erupting. Extremely rare  
 7 functional gomphosis and no incidences of post-mortem tooth loss. Teeth also very rarely  
 8 found in the intermediate mineralization stage (i.e. incompletely ankylosed to the jaws).

9 State 1: Functional gomphosis and ankylosis present. Teeth found in all four stages. Some  
 10 teeth found ankylosed, some possibly lost post-mortem. Can see all stages across a thin  
 11 section of a jaw.

12 State 2: Functional gomphosis present and ankylosis absent. Teeth only found in thin  
 13 section as gomphosis attachment or in the process of erupting. Ankylosis occurs only  
 14 pathologically. Mineralization of periodontium is very limited, and typically associated  
 15 with incremental cementum deposition. Post-mortem tooth loss very common.

16

17

| Taxon                                   | Replacement | Gomphosis | Mineralization | Ankylosis | Character state for terminal taxon (0, 1, 2) |
|-----------------------------------------|-------------|-----------|----------------|-----------|----------------------------------------------|
| <i>Oromycter</i> (ROM 67604)            | 1           | 0         | 0              | 4         | <b>Cascidae</b>                              |
| <i>Oromycter</i> (ROM 67605)            | 1           | 0         | 0              | 2         | <b>0</b>                                     |
| Varanopid indet. (ROM 67514)            | 3           | 0         | 0              | 6         | <b>Varanopidae</b>                           |
| Varanopid indet. (ROM 66866)            | 4           | 0         | 1              | 4         | <b>0</b>                                     |
| Edaphosaurid (NHB 2041070)              | 0           | 0         | 1              | 3         | <b>Edaphosauridae 0</b>                      |
| <i>Secodontosaurus</i> (ROM 6027)       | 0           | 0         | 1              | 2         | <b>Sphenacodontidae</b>                      |
| <i>Secodontosaurus</i> (UMMP 9714)      | 0           | 0         | 0              | 2         |                                              |
| <i>Sphenacodon ferocior</i> (ROM 66105) | 1           | 0         | 0              | 2         |                                              |

|                                                    |   |   |   |   |                      |
|----------------------------------------------------|---|---|---|---|----------------------|
| <i>Sphenacodon ferocior</i> (CM 89931)             | 1 | 0 | 0 | 3 | 0                    |
| <i>Dimetrodon limbatus</i> (StIPB R-602)           | 0 | 0 | 1 | 4 |                      |
| <i>Dimetrodon limbatus</i> (StIPB-R601)            | 2 | 0 | 0 | 3 |                      |
| <i>Dimetrodon grandis</i> (ROM 6039)               | 0 | 0 | 0 | 2 |                      |
| Dinocephalia indet. (BP/1/6854)                    | 2 | 1 | 4 | 0 | Dinocephalia indet.  |
| Dinocephalia indet. (BP/1/4851)                    | 0 | 1 | 2 | 0 | 1                    |
| Dinocephalia indet. (BP/1/5417)                    | 0 | 0 | 4 | 1 |                      |
| Tapinocephalidae indet. (NHCC LB 370)              | 1 | 2 | 0 | 0 | Tapinocephalidae     |
| Tapinocephalidae indet. (NHCC LB 369); jaw figured | 2 | 2 | 0 | 0 | 2                    |
| <i>Diictodon</i> "A" (ROM 52624)                   | 0 | 0 | 2 | 0 | Anomodontia          |
| <i>Diictodon</i> "B" (ROM 52624)                   | 0 | 0 | 0 | 2 |                      |
| <i>Diictodon</i> "C" (ROM 52624)                   | 0 | 1 | 0 | 0 | 1 & 2                |
| <i>Lystrosaurus</i> (UWBM 109908)                  | 0 | 1 | 0 | 0 |                      |
| Gorgonopsia indet. (BP/1/784)                      | 3 | 4 | 0 | 0 | Gorgonopsia          |
| Gorgonopsia indet. (BP/1/2395a)                    | 1 | 4 | 0 | 0 |                      |
| Gorgonopsia indet. (NMT RB404)                     | 0 | 1 | 0 | 0 | 2                    |
| Gorgonopsia (NHCC LB 367)                          | 0 | 1 | 0 | 0 |                      |
| Therocephalia indet. (BP/1/7257)                   | 2 | 4 | 1 | 1 | Therocephalia indet. |
| Therocephalia indet. (BP/1/172)                    | 3 | 5 | 0 | 0 | 1 & 2                |
| <i>Moschorhinus kitchingi</i> (BP/1/2788)          | 0 | 1 | 1 | 0 |                      |

|                                                                                       |   |    |    |   |                                    |
|---------------------------------------------------------------------------------------|---|----|----|---|------------------------------------|
| <i>Bauria</i><br>(BP/1/2523)                                                          | 3 | 9  | 0  | 0 | <b>Bauria 2</b>                    |
| <i>Galesaurus</i><br>(BP/1/4602)                                                      | 4 | 13 | 0  | 0 | <b>Galesaurus</b>                  |
| <i>Galesaurus</i><br>(BP/1/5064)                                                      | 4 | 34 | 0  | 0 | <b>2</b>                           |
| <i>Thrinaxodon</i><br>(BP/1/5372)                                                     | 7 | 22 | 10 | 2 | <b>Thrinaxodon</b>                 |
| <i>Thrinaxodon</i><br>(BP/1/7199)                                                     | 8 | 28 | 6  | 5 | <b>1</b>                           |
| ? <i>Cynognathus</i><br>(BP/1/6097)                                                   | 1 | 2  | 0  | 0 | <b>Cynognathia</b>                 |
| <i>Diademodon</i><br>(BP/1/1171)                                                      | 2 | 6  | 0  | 0 | <b>2</b>                           |
| <i>Diademodon</i><br>(BP/1/4652)                                                      | 0 | 9  | 0  | 0 |                                    |
| <i>Tritylodon</i><br>(SAM-PK-K407)<br>(Taken from<br>Jasinoski and<br>Chinsamy, 2012) | 0 | 3  | 0  | 0 | <b>Probainognathia</b><br><b>2</b> |
| <i>Hyopsodus</i><br>(USNM 595273)                                                     | 0 | 3  | 0  | 0 | <b>Mammalia</b>                    |
| <i>Equus</i> (ROM<br>33036)                                                           | 0 | 2  | 0  | 0 | <b>2</b>                           |

1

2 **Table S2.** Frequencies of tooth stages observed in sectioned and CT-scanned synapsid  
3 specimens. Two additional specimens were added to the dataset from personal  
4 observations of cut and polished specimens (*Moschorhinus* [BP/1/2788] and *Diademodon*  
5 [BP/1/1171]). The colours correspond to the character states in main text figure 4.

6 The topology used for character state reconstruction was the strict consensus tree  
7 from Sidor and Hopson[14]. Varanopids and caseids were not added to the original data  
8 matrix due to ongoing uncertainty in their phylogenetic positions[14,19]. We ran the data  
9 matrix from Sidor and Hopson[14] under a heuristic search and the parsimony optimality  
10 criterion using PAUP\* [20] ver.4.0a162. We were able to generate the same strict  
11 consensus tree from three most parsimonious trees as Sidor and Hopson[14], but with  
12 slightly different tree scores (TL: 369; CI: 0.661; RCI: 0.565).

13 The new character (character 182) was then added and treated as unordered under  
14 parsimony and was examined using the “Trace Character History” function in Mesquite  
15 using the taxon-character matrix and strict consensus topology from Sidor and

1 Hopson[14]. Character coding for “Ophiacodontidae” was taken from descriptions by  
2 Edmund[21] who noted that the teeth of *Ophiacodon* and *Varanosaurus* were ankylosed  
3 at maturity, but might have spent more time in a non-ankylosed state than those of  
4 sphenacodontids. Due to the fact that we did not have histological or CT scan data for any  
5 biarmosuchian, “Biarmosuchia” was coded as “?” (however, see the anatomical  
6 observations of tooth attachment in the biarmosuchian *Niaftasuchus* [Supplementary  
7 Information 1]). “Estemmenosuchidae” was treated as the lineage that includes  
8 tapinocephalids and “Anteosauridae” was treated as the group of dinocephalians  
9 represented by the thin sections of non-tapinocephalid dinocephalians examined in this  
10 study, given that the dental morphology of the sampled specimens was consistent with  
11 omnivorous or carnivorous dinocephalian taxa. Codings for “*Probainognathus*”,  
12 “*Probelesodon*”, were left as “?” and “Tritheledontidae” was coded as state “1” based on  
13 descriptions of tooth attachment in several members of the group [22,23]. Observed  
14 character states for *Cynognathus* and *Diademodon* were used to code the OTU  
15 “Cynognathia”. It is worth noting that the probainognathan *Tritylodon* probably exhibited  
16 a permanent gomphosis (state “2”) [24], but other probainognathans probably exhibit  
17 state “1” [22,23]. This character was left as “?” for *Probainognathus* in the phylogeny of  
18 Sidor and Hopson [14].

19

## 20 Supplementary Information S3: Evidence for reduced tooth 21 replacement rates in Therapsida

22 We found evidence that prolonged periods of time had passed between tooth replacement  
23 events in therapsids compared to “pelycosaurs” (Suppl. Fig. 17). In two of the  
24 therocephalians and some cynodonts sampled for this study, the functional teeth show  
25 evidence of extensive tooth migration (towards the upper left corner of the figure). In  
26 these instances, non-ankylosed teeth along the dentaries are surrounded by alveolar bone  
27 that is extremely unequal in thickness (Suppl. Fig. 17a, b, c). Thick layers of spongy  
28 alveolar bone define the trailing edge of the migrating tooth and tooth socket, whereas the  
29 leading edge is resorptive, with only a thin veneer of alveolar bone forming the alveolus.

1 This type of tooth migration has been documented in mammals and is mediated by a  
2 periodontal ligament [25]. Such tooth migration occasionally produced an offset between  
3 the functional tooth and its replacement tooth, resulting in slightly uneven root resorption  
4 (Suppl. Fig. 17c). Large fragments of dentine are also preserved in between functional  
5 teeth in gorgonopsians, dinocephalians, and therocephalians (Suppl. Fig. 17b, d, e, f),  
6 which are all indicators of extensive tooth migration prior to replacement. Lastly, in some  
7 instances, the replacement tooth is significantly larger than the previous tooth generation  
8 (Suppl. Fig. 17f), further suggesting an extended period of time has passed between  
9 replacement events.

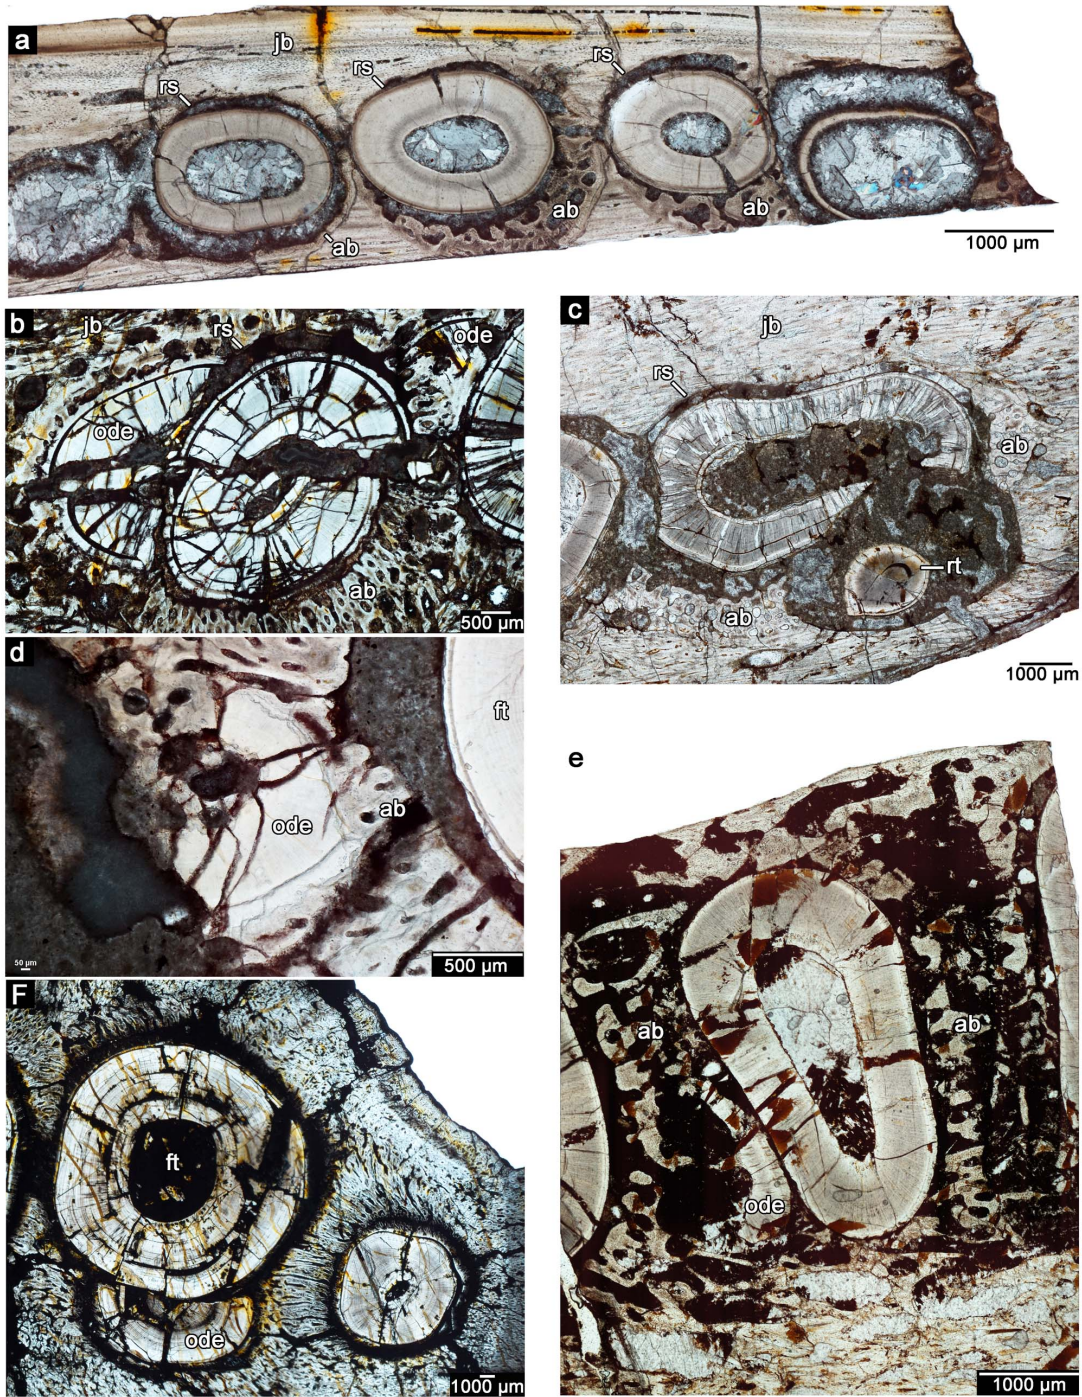

1

2 **Supplementary Figure 17.** Evidence for extensive tooth drift and reduced tooth  
 3 replacement rates in non-mammalian therapsids. **a**, whole view of a transverse section  
 4 through the dentary of a therocephalian (BP/1/172) where each tooth has drifted towards  
 5 the top left of the image. **b**, close-up of a single tooth in transverse section of a  
 6 therocephalian dentary (BP/1/7257) in which the tooth has migrated towards the top left

1 of the image, resorbing significant portions of an older, ankylosed tooth in the process. **c**,  
2 close-up of a dentary tooth of *Cynognathus* (BP/1/6097) that has migrated towards the  
3 top left of the image. As a result, the developing replacement tooth is distally offset from  
4 the functional tooth and does not resorb the middle of the older root. **d**, close-up of a  
5 remnant of an old tooth root that is located in between two tooth positions in a transverse  
6 section of a gorgonopsian maxilla (BP/1/2395a), which is a clear indication of extensive  
7 mesiodistal drift of the teeth over ontogeny. **e**, close-up of a single dentary tooth root of  
8 the therocephalian *Bauria* (BP/1/2523) in transverse section that is flanked on the left by  
9 a remnant of an old tooth root. This is indicative of extensive mesiodistal drift of the two  
10 generations of teeth. **f**, close-up of a single, functional dentary tooth of a dinocephalian  
11 (BP/1/4851) and its older, smaller predecessor in transverse section. The size discrepancy  
12 between the two generations of teeth indicates an extended period of growth in between  
13 tooth replacement events. Abbreviations: ab, alveolar bone; ft, functional tooth; jb,  
14 jawbone; ode, dentine of older tooth; rs, resorptive surface; rt, replacement tooth.

15

## 16 References

- 17 1. Reisz RR. 2006 Origin of dental occlusion in tetrapods: signal for terrestrial  
18 vertebrate evolution? *J. Exp. Zoolog. B Mol. Dev. Evol.* **306B**, 261–277.
- 19 2. LeBlanc ARH, Reisz RR. 2015 Patterns of tooth development and replacement in  
20 captorhinid reptiles: a comparative approach for understanding the origin of multiple  
21 tooth rows. *J. Vertebr. Paleontol.* , e919928.
- 22 3. Reisz RR, Berman DS. 2001 The skull of *Mesenosaurus romeri*, a small varanopseid  
23 (Synapsida: Eupelycosauria) from the Upper Permian of the Mezen River Basin,  
24 northern Russia. *Ann. Carnegie Mus.* **70**, 113–132.
- 25 4. Brink KS, LeBlanc ARH, Reisz RR. 2014 First record of plicidentine in Synapsida  
26 and patterns of tooth root shape change in Early Permian sphenacodontians.  
27 *Naturwissenschaften* **101**, 883–892.
- 28 5. LeBlanc ARH, Brink KS, Cullen TM, Reisz RR. 2017 Evolutionary implications of  
29 tooth attachment versus tooth implantation: A case study using dinosaur, crocodylian,  
30 and mammal teeth. *J. Vertebr. Paleontol.* , e1354006.
- 31 6. Caldwell MW. 2007 Ontogeny, anatomy and attachment of the dentition in  
32 mosasaurs (Mosasauridae: Squamata). *Zool. J. Linn. Soc.* **149**, 687–700.



- 1 7. LeBlanc ARH, Reisz RR. 2013 Periodontal Ligament, Cementum, and Alveolar Bone  
2 in the Oldest Herbivorous Tetrapods, and Their Evolutionary Significance. *PLoS*  
3 *ONE* **8**, e74697.
- 4 8. Reid REH. 1996 Bone histology of the Cleveland-Lloyd dinosaurs and of dinosaurs  
5 in general, Part I: Introduction: Introduction to bone tissues. *Brigh. Young Univ.*  
6 *Geol. Stud.* **41**, 25–72.
- 7 9. Caldwell MW, Budney LA, Lamoureux DO. 2003 Histology of tooth attachment  
8 tissues in the Late Cretaceous mosasaurid *Platecarpus*. *J. Vertebr. Paleontol.* **23**,  
9 622–630.
- 10 10. Budney LA, Caldwell MW, Albino A. 2006 Tooth socket histology in the Cretaceous  
11 snake *Dinilysia*, with a review of Amniote dental attachment tissues. *J. Vertebr.*  
12 *Paleontol.* **26**, 138–145.
- 13 11. Hopson JA. 1969 The origin and adaptive radiation of mammal-like reptiles and  
14 nontherian mammals. *Ann. N. Y. Acad. Sci.* **167**, 199–216.
- 15 12. LeBlanc ARH, Reisz RR, Brink KS, Abdala F. 2016 Mineralized periodontia in  
16 extinct relatives of mammals shed light on the evolutionary history of mineral  
17 homeostasis in periodontal tissue maintenance. *J. Clin. Periodontol.* **43**, 323–332.  
18 (doi:10.1111/jcpe.12508)
- 19 13. Sullivan C, Reisz RR, Smith RMH. 2003 The Permian mammal-like herbivore  
20 *Diictodon*, the oldest known example of sexually dimorphic armament. *Proc. R. Soc.*  
21 *B Biol. Sci.* **270**, 173–178.
- 22 14. Sidor CA, Hopson JA. 1998 Ghost lineages and ‘mammalness’: assessing the  
23 temporal pattern of character acquisition in the Synapsida. **24**, 254–273.
- 24 15. Huttenlocker A. 2009 An investigation into the cladistic relationships and monophyly  
25 of therocephalian therapsids (Amniota: Synapsida). *Zool. J. Linn. Soc.* **157**, 865–891.
- 26 16. Jasinowski SC, Abdala F. 2016 Cranial Ontogeny of the Early Triassic Basal Cynodont  
27 *Galesaurus planiceps*. *Anat. Rec.* **300**, 353–381.
- 28 17. Abdala F, Jasinowski SC, Fernandez V. 2013 Ontogeny of the Early Triassic cynodont  
29 *Thrinaxodon liorhinus* (Therapsida): dental morphology and replacement. *J. Vertebr.*  
30 *Paleontol.* **33**, 1408–1431.
- 31 18. Nanci A. 2013 *Ten Cate’s Oral Histology: Development, Structure, and Function*.  
32 8th edn. St. Louis, Missouri: Elsevier Mosby.
- 33 19. Benson RBJ. 2012 Interrelationships of basal synapsids: cranial and postcranial  
34 morphological partitions suggest different topologies. *J. Syst. Palaeontol.* **10**, 601–  
35 624.

- 1 20. Swofford DL. 2002 *Phylogenetic Analysis Using Parsimony (\*And Other Methods)*.  
2 Sunderland, Massachusetts: Sinaeur Associates.
- 3 21. Edmund AG. 1960 Tooth replacement phenomena in the lower vertebrates. *R. Ont.*  
4 *Mus. Life Sci. Div. Contrib.* **52**, 1–190.
- 5 22. Gow CE. 1980 The dentitions of the Tritheledontidae (Therapsida: Cynodontia).  
6 *Proc. R. Soc. Lond. B Biol. Sci.* **208**, 461–481.
- 7 23. Shubin NH, Crompton AW, Sues H-. D, Olsen PE. 1991 New fossil evidence on the  
8 sister-group of mammals and early Mesozoic faunal distributions. *Science* **4997**,  
9 1063–1065.
- 10 24. Jasinowski SC, Chinsamy A. 2012 Mandibular histology and growth of the  
11 nonmammaliaform cynodont *Tritylodon*. *J. Anat.* **220**, 564–579.
- 12 25. Saffar J-L, Lasfargues J-J, Cherruau M. 1997 Alveolar bone and the alveolar process:  
13 the socket that is never stable. *Periodontol.* *2000* **13**, 76–90.
- 14
